# Supplementary material for: KOH-mediated transition metal-free synthesis of imines from alcohols and amines
Source: Royal Society of Chemistry journal article supplement (doi:10.1039/c2gc35714c), 2012-01-01

**Supplementary Information**  
for

**KOH-Mediated Transition-Metal-Free Synthesis of Imines from Alcohols and Amines**

Jian Xu, Rongqiang Zhuang, Lingling Bao, Guo Tang,\* Yufen Zhao

Department of Chemistry, College of Chemistry and Chemical Engineering, and the Key Laboratory for Chemical Biology of Fujian Province, Xiamen University, Xiamen 361005, P. R. China.

[t12g21@xmu.edu.cn](mailto:t12g21@xmu.edu.cn);

**Table of Contents**

Page 2 – 4 Spectral Data

Page 5 – 23 <sup>1</sup>H NMR and <sup>13</sup>C NMR Spectra of all compounds

## Spectral Data

### *N*-Benzylideneaniline (3a, CAS Number: 538-51-2).

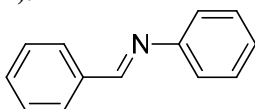

$^1\text{H}$  NMR (400 MHz,  $\text{CDCl}_3$ ):  $\delta$  8.44 (s, 1H), 7.92-7.87 (m, 2 H), 7.49-7.43 (m, 3 H), 7.41-7.34 (m, 2 H), 7.26-7.20 (m, 3 H).  
 $^{13}\text{C}$  NMR (100 MHz,  $\text{CDCl}_3$ ):  $\delta$  160.4, 152.1, 136.2, 131.3, 129.1, 128.8, 128.8, 125.9, 120.8. MS-ESI:  $m/z$  181.9  $[\text{M}+\text{H}]^+$ .

### *N*-Benzylidene-4-methoxyaniline (3b, CAS Number: 783-08-4).

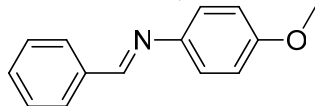

$^1\text{H}$  NMR (400 MHz,  $\text{CDCl}_3$ ):  $\delta$  8.46 (s, 1 H), 7.89-7.85 (m, 2 H), 7.46-7.42 (m, 3 H), 7.22 (d,  $J = 9.0$  Hz, 2 H), 6.94-6.90 (m, 2 H), 3.80 (s, 3 H).  $^{13}\text{C}$  NMR (100 MHz,  $\text{CDCl}_3$ ):  $\delta$  158.3, 158.2, 144.9, 136.4, 131.0, 128.7, 128.5, 122.1, 114.3, 55.4. MS-ESI:  $m/z$  211.8  $[\text{M}+\text{H}]^+$ .

### *N*-Benzylidene-4-methylaniline (3c, CAS Number: 2272-45-9).

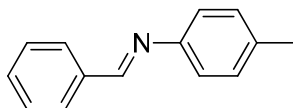

$^1\text{H}$  NMR (400 MHz,  $\text{CDCl}_3$ ):  $\delta$  8.43 (s, 1 H), 7.90-7.86 (m, 2 H), 7.47-7.40 (m, 3 H), 7.17 (d,  $J = 8.4$  Hz, 2 H), 7.14 (d,  $J = 8.2$  Hz, 2 H), 2.35 (s, 3 H).  $^{13}\text{C}$  NMR (100 MHz,  $\text{CDCl}_3$ ):  $\delta$  159.5, 149.4, 136.3, 135.7, 131.1, 129.7, 128.7, 128.6, 120.8, 20.9. MS-ESI:  $m/z$  195.8  $[\text{M}+\text{H}]^+$ .

### *N*-Benzylidene-3-methylaniline (3d, CAS Number: 5877-58-7)

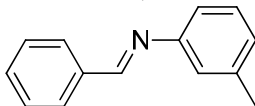

$^1\text{H}$  NMR (400 MHz,  $\text{CDCl}_3$ ):  $\delta$  8.43 (s, 1 H), 7.91-7.86 (m, 2 H), 7.47-7.43 (m, 3 H), 7.26 (t,  $J = 7.5$  Hz, 1 H), 7.05-7.00 (t,  $J = 9.3$  Hz, 3 H), 2.38 (s, 3 H).  $^{13}\text{C}$  NMR (100 MHz,  $\text{CDCl}_3$ ):  $\delta$  160.1, 152.1, 138.9, 136.3, 131.3, 128.9, 128.7, 128.6, 126.7, 121.6, 117.8, 21.4. MS-ESI:  $m/z$  195.9  $[\text{M}+\text{H}]^+$ .

### *N*-benzylidene-2-methylaniline (3e, CAS Number: 5877-55-4)

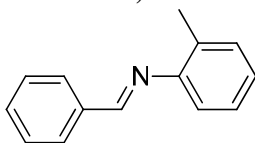

$^1\text{H}$  NMR (400 MHz,  $\text{CDCl}_3$ ):  $\delta$  8.36 (s, 1 H), 7.95-7.89 (m, 2 H), 7.50-7.45 (m, 3 H), 7.24-7.18 (m, 2 H), 7.15-7.10 (m, 1 H), 6.94-6.90 (m, 1 H), 2.36 (s, 3 H).  $^{13}\text{C}$  NMR (100 MHz,  $\text{CDCl}_3$ ):  $\delta$  159.4, 151.1, 136.5, 131.8, 131.2, 130.2, 128.7, 126.7, 125.6, 117.8, 17.8. MS-ESI:  $m/z$  195.8  $[\text{M}+\text{H}]^+$ .

### *N*-benzylidenenaphthalen-1-amine (3f, CAS Number: 890-51-7)

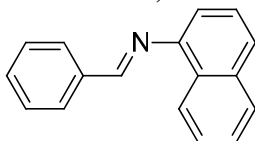

$^1\text{H}$  NMR (400 MHz,  $\text{CDCl}_3$ ):  $\delta$  8.49 (s, 1 H),  $\delta$  8.38-8.31 (m, 1H),  $\delta$  8.01-7.95 (m, 2 H),  $\delta$  7.85-7.78 (m, 1 H),  $\delta$  7.71-7.65 (m, 1 H),  $\delta$  7.52-7.38 (m, 6 H),  $\delta$  8.557.04-6.98 (m, 1 H).  $^{13}\text{C}$  NMR (100 MHz,  $\text{CDCl}_3$ ):  $\delta$  160.3, 149.3, 136.4, 134.0, 131.4, 128.9, 128.8, 127.6, 126.4, 126.0, 125.8, 125.7, 124.0, 112.8. MS-ESI:  $m/z$  231.7  $[\text{M}+\text{H}]^+$ .

***N*-Benzylidene-3-bromoaniline (3g, CAS Number: 20534-67-2)**

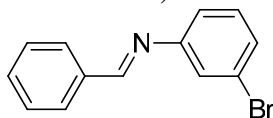

$^1\text{H}$  NMR (400 MHz,  $\text{CDCl}_3$ ):  $\delta$  8.38 (s, 1 H), 7.89-7.84 (m, 2 H), 7.50-7.43 (m, 3 H), 7.36-7.32 (m, 2 H), 7.25-7.20 (m, 1 H), 7.14-7.10 (m, 1 H).  $^{13}\text{C}$  NMR (100 MHz,  $\text{CDCl}_3$ ):  $\delta$  161.3, 153.4, 135.8, 131.7, 130.4, 128.9, 128.8, 128.7, 123.7, 122.7, 119.9. MS-ESI:  $m/z$  259.6  $[\text{M}+\text{H}]^+$ .

***N*-Benzylidene-4-chloroaniline (3h, CAS Number: 780-21-2).**

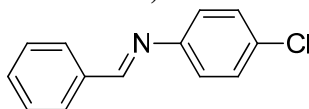

$^1\text{H}$  NMR (400 MHz,  $\text{CDCl}_3$ ):  $\delta$  8.40 (s, 1 H), 7.90-7.84 (m, 2 H), 7.49-7.42 (m, 3 H), 7.36-7.30 (m, 2 H), 7.16-7.09 (m, 2 H).  $^{13}\text{C}$  NMR (100 MHz,  $\text{CDCl}_3$ ):  $\delta$  160.6, 150.4, 135.9, 131.6, 131.4, 129.2, 128.8, 128.7, 122.2. MS-ESI:  $m/z$  215.8  $[\text{M}+\text{H}]^+$ .

***N*-Benzylidenebenzylamine (3i, CAS Number: 780-25-6).**

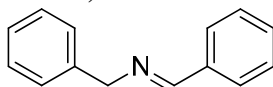

$^1\text{H}$  NMR (400 MHz,  $\text{CDCl}_3$ ):  $\delta$  8.36 (s, 1 H), 7.82-7.71 (m, 2 H), 7.40 (m, 3 H), 7.33 (m, 4 H), 7.27-7.21 (m, 1 H), 4.80 (s, 2 H).  $^{13}\text{C}$  NMR (100 MHz,  $\text{CDCl}_3$ ):  $\delta$  161.9, 139.3, 136.1, 130.7, 128.5, 128.4, 128.2, 127.9, 126.9, 65.0. MS-ESI:  $m/z$  195.8  $[\text{M}+\text{H}]^+$ .

***N*-Benzylidenecyclohexanamine (3j, CAS Number: 2211-66-7).**

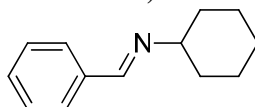

$^1\text{H}$  NMR (400 MHz,  $\text{CDCl}_3$ ):  $\delta$  8.29 (s, 1 H), 7.74-7.68 (m, 2 H), 7.42-7.33 (m, 3 H), 3.23-3.12 (m, 1 H), 1.86-1.54 (m, 7 H), 1.43-1.22 (m, 3 H).  $^{13}\text{C}$  NMR (100 MHz,  $\text{CDCl}_3$ ):  $\delta$  158.5, 136.6, 130.2, 128.4, 128.0, 69.9, 34.3, 25.6, 24.7. MS-ESI:  $m/z$  187.9  $[\text{M}+\text{H}]^+$ .

***N*-Benzylidenebutan-1-amine (3k, CAS Number: 119719-32-3).**

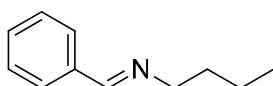

$^1\text{H}$  NMR (400 MHz,  $\text{CDCl}_3$ ):  $\delta$  8.23 (s, 1 H), 7.67-7.64 (m, 2 H), 7.39-7.36 (m, 2 H), 3.60 (t,  $J = 7.0$  Hz, 2 H), 1.73-1.66 (m, 2 H), 1.45-1.34 (m, 2 H), 0.95 (t,  $J = 7.4$  Hz, 3 H).  $^{13}\text{C}$  NMR (100 MHz,  $\text{CDCl}_3$ ):  $\delta$  160.7, 136.4, 130.4, 128.5, 128.0, 61.5, 33.0, 20.4, 13.9. MS-ESI:  $m/z$  162.0  $[\text{M}+\text{H}]^+$ .

***N*-(4-chlorobenzylidene) butan-1-amine (3l, CAS Number: 7173-86-6)**

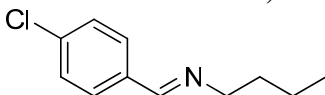

$^1\text{H}$  NMR (400 MHz,  $\text{CDCl}_3$ ):  $\delta$  8.21 (s, 1 H), 7.71-7.66 (m, 2 H), 6.96-6.90 (m, 2 H), 3.84 (s, 2 H), 1.71-1.63 (m, 2 H), 1.45-1.35 (m, 2 H), 0.94 (t,  $J = 7.5$  Hz, 3 H).  $^{13}\text{C}$  NMR (100 MHz,  $\text{CDCl}_3$ ):  $\delta$  159.3, 136.3, 134.9, 129.2, 128.8, 61.4, 32.9, 20.4, 13.9. MS-ESI:  $m/z$  195.8  $[\text{M}+\text{H}]^+$ .

***N*-(4-Methoxybenzylidene) butan-1-amine (3m CAS Number: 3910-55-2).**

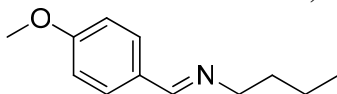

$^1\text{H}$  NMR (400 MHz,  $\text{CDCl}_3$ ):  $\delta$  8.19 (s, 1 H), 7.66 (d,  $J = 8.8$  Hz, 2 H), 6.91 (d,  $J = 8.9$  Hz, 2 H), 3.82 (s, 3 H), 3.57 (t,  $J = 6.9$  Hz, 2 H), 1.70-1.62 (m, 2 H), 1.43-1.32 (m, 2 H), 0.94 (t,  $J = 7.3$  Hz, 3 H).  $^{13}\text{C}$  NMR (100 MHz,  $\text{CDCl}_3$ ):  $\delta$  161.4, 160.0, 129.5, 129.3, 113.9, 61.3, 55.3, 33.1, 20.4, 13.9. MS-ESI:  $m/z$  191.9  $[\text{M}+\text{H}]^+$ .

***N*-(4-chlorobenzylidene) aniline (3n, CAS Number: 2362-79-0)**

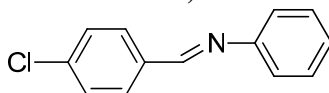

$^1\text{H}$  NMR (400 MHz,  $\text{CDCl}_3$ ):  $\delta$  8.41 (s, 1 H), 7.85-7.82 (m, 2 H), 7.46-7.36 (m, 4 H), 7.26-7.18 (m, 3 H).  $^{13}\text{C}$  NMR (100 MHz,  $\text{CDCl}_3$ ):  $\delta$  158.8, 151.7, 137.4, 134.7, 129.9, 129.2, 129.1, 126.2, 120.8. MS-ESI:  $m/z$  215.7  $[\text{M}+\text{H}]^+$ .

***N*-(2-bromobenzylidene) aniline (3o, CAS Number: 41077-23-0)**

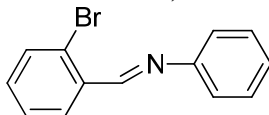

$^1\text{H}$  NMR (400 MHz,  $\text{CDCl}_3$ ):  $\delta$  8.91 (s, 1 H), 8.29 (d,  $J = 7.7$  Hz, 1 H), 7.66 (d,  $J = 8.2$  Hz, 1 H), 7.49-7.42 (m, 3 H), 7.37-7.29 (m, 3 H).  $^{13}\text{C}$  NMR (100 MHz,  $\text{CDCl}_3$ ):  $\delta$  159.2, 151.6, 134.5, 133.1, 132.3, 129.1, 129.0, 127.7, 126.3, 126.0, 121.0. MS-ESI:  $m/z$  259.6  $[\text{M}+\text{H}]^+$ .

***N*-(4-bromobenzylidene) aniline (3p, CAS Number: 5877-51-0)**

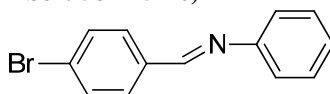

$^1\text{H}$  NMR (400 MHz,  $\text{CDCl}_3$ ):  $\delta$  8.39 (s, 1 H), 7.78-7.74 (m, 2 H), 7.62 (d,  $J = 1.85$  Hz, 2 H), 7.42-7.36 (m, 2 H), 7.26-7.18 (m, 3 H).  $^{13}\text{C}$  NMR (100 MHz,  $\text{CDCl}_3$ ):  $\delta$  158.8, 151.6, 135.1, 132.0, 130.1, 129.2, 126.2, 125.9, 120.8. MS-ESI:  $m/z$  259.6  $[\text{M}+\text{H}]^+$ .

***N*-(4-Methoxybenzylidene) aniline (3q, CAS Number: 836-41-9).**

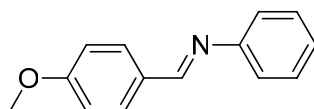

$^1\text{H}$  NMR (400 MHz,  $\text{CDCl}_3$ ):  $\delta$  8.37 (s, 1 H), 7.86-7.82 (d,  $J = 8.75$  Hz, 2 H), 7.39-7.34 (m, 2 H), 7.23-7.16 (m, 3 H), 7.00-6.96 (d,  $J = 9.01$  Hz, 2 H), 3.85 (s, 3 H).  $^{13}\text{C}$  NMR (100 MHz,  $\text{CDCl}_3$ ):  $\delta$  162.2, 159.6, 152.4, 130.5, 129.3, 129.1, 125.5, 120.8, 114.1, 55.4. MS-ESI:  $m/z$  211.8  $[\text{M}+\text{H}]^+$ .

***N*-(4-methylbenzylidene) aniline (3r, CAS Number: 2362-77-8)**

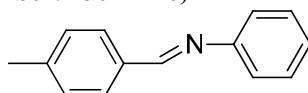

$^1\text{H}$  NMR (400 MHz,  $\text{CDCl}_3$ ):  $\delta$  8.39 (s, 1 H), 7.79-7.76 (m, 2 H), 7.39-7.34 (m, 2 H), 7.29-7.24 (m, 2 H), 7.22-7.17 (m, 3 H), 2.39 (s, 3 H).  $^{13}\text{C}$  NMR (100 MHz,  $\text{CDCl}_3$ ):  $\delta$  160.2, 152.2, 141.8, 133.7, 129.5, 129.1, 128.8, 125.7, 120.8, 21.6. MS-ESI:  $m/z$  195.9  $[\text{M}+\text{H}]^+$ .

***N*-(3,4-dimethoxybenzylidene) aniline (3s, CAS Number: 27895-67-6)**

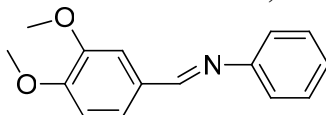

$^1\text{H}$  NMR (400 MHz,  $\text{CDCl}_3$ ):  $\delta$  8.36 (s, 1 H), 7.63-7.61 (m, 1 H), 7.40-7.36 (m, 2 H), 7.31-7.28 (m, 1 H), 7.23-7.17 (m, 3 H), 6.92 (d,  $J = 8.2$  Hz, 1 H), 3.98 (s, 3 H), 3.94 (s, 3 H).  $^{13}\text{C}$  NMR (100 MHz,  $\text{CDCl}_3$ ):  $\delta$  159.8, 152.2, 152.0, 149.5, 129.6, 129.1, 125.6, 124.4, 120.8, 110.5, 108.9, 56.0. MS-ESI:  $m/z$  241.7  $[\text{M}+\text{H}]^+$ .

$^1\text{H}$  and  $^{13}\text{C}$  NMR spectra of all compounds

3a

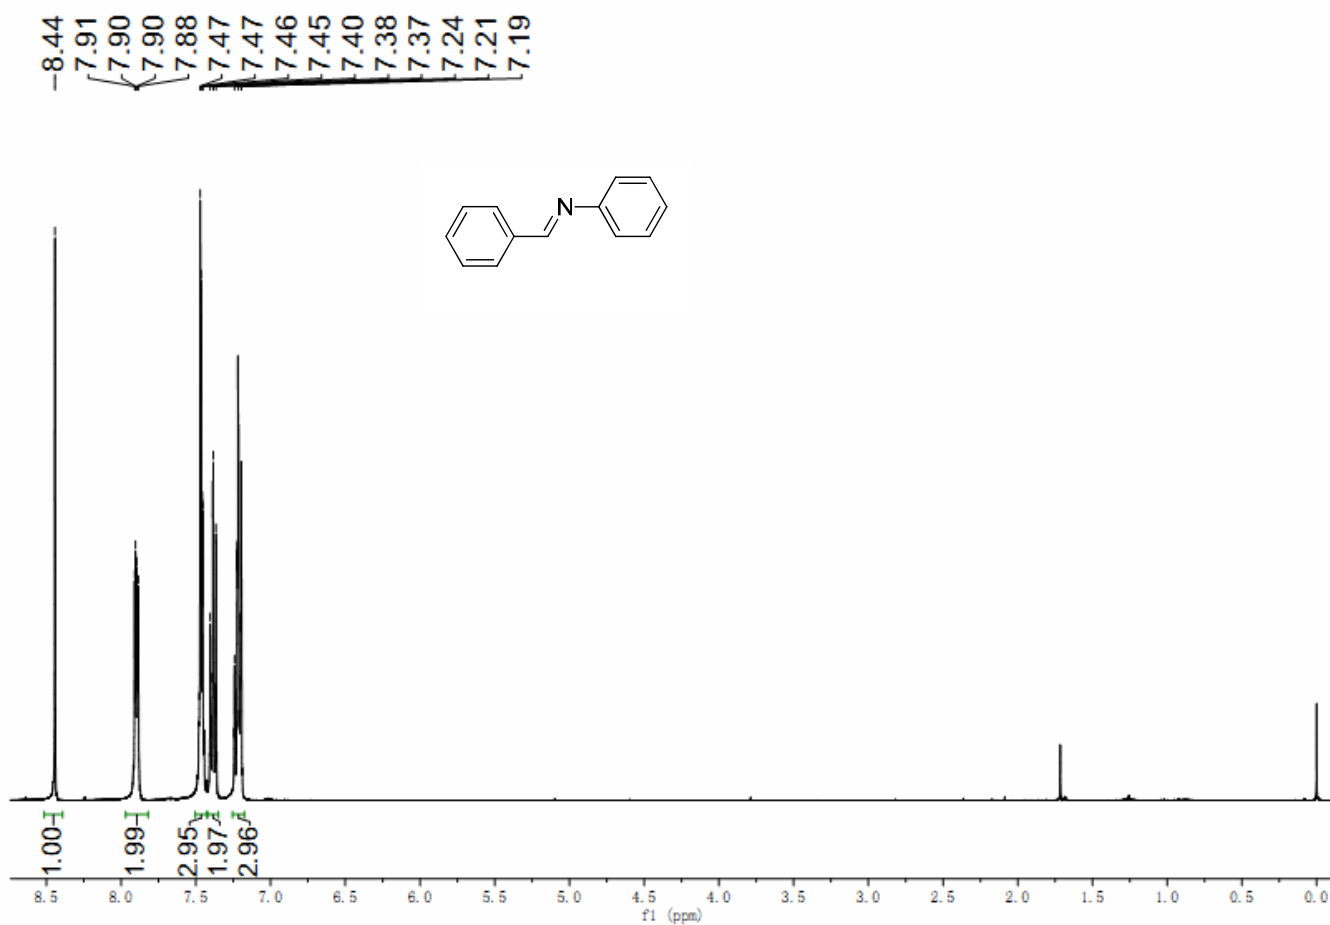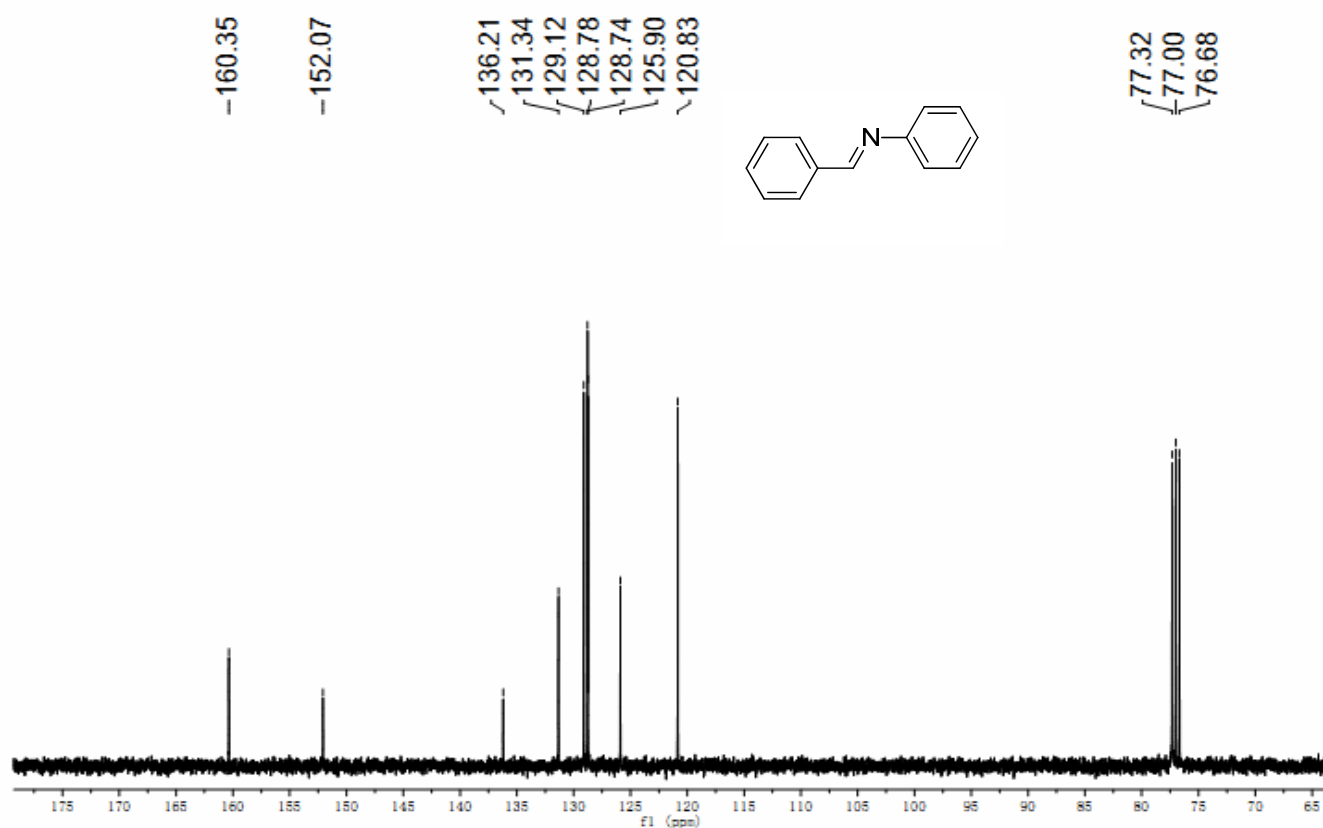

3b

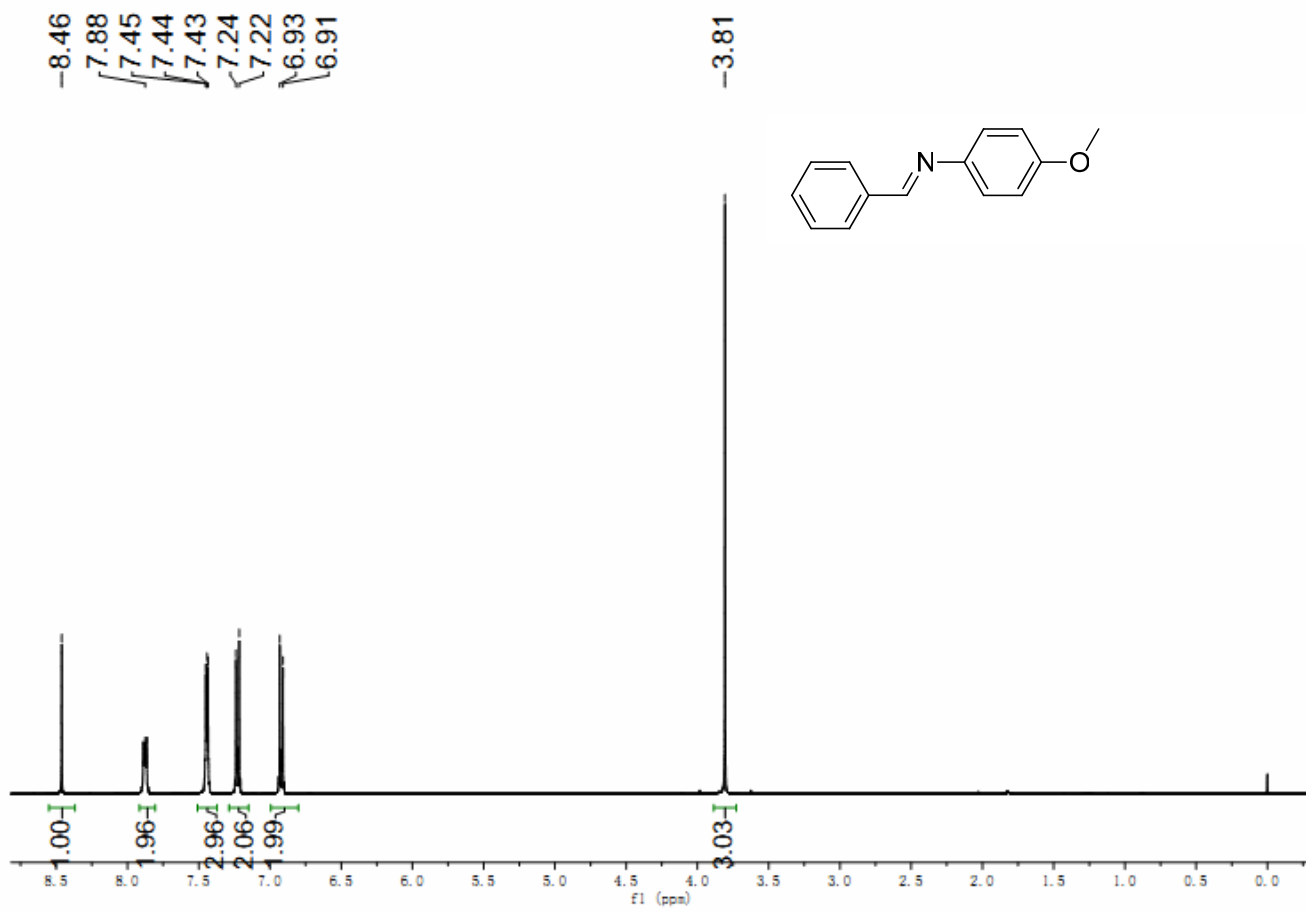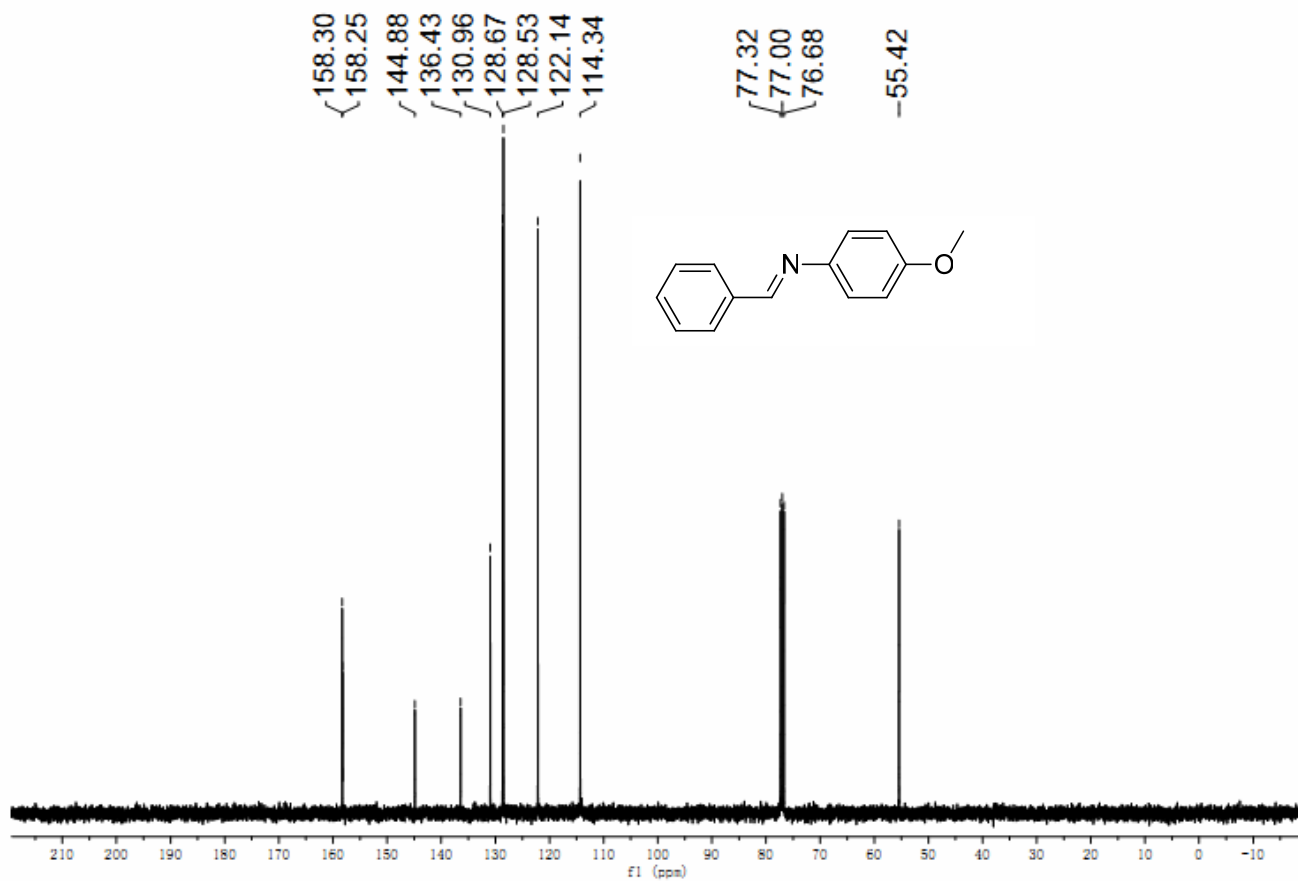

3c

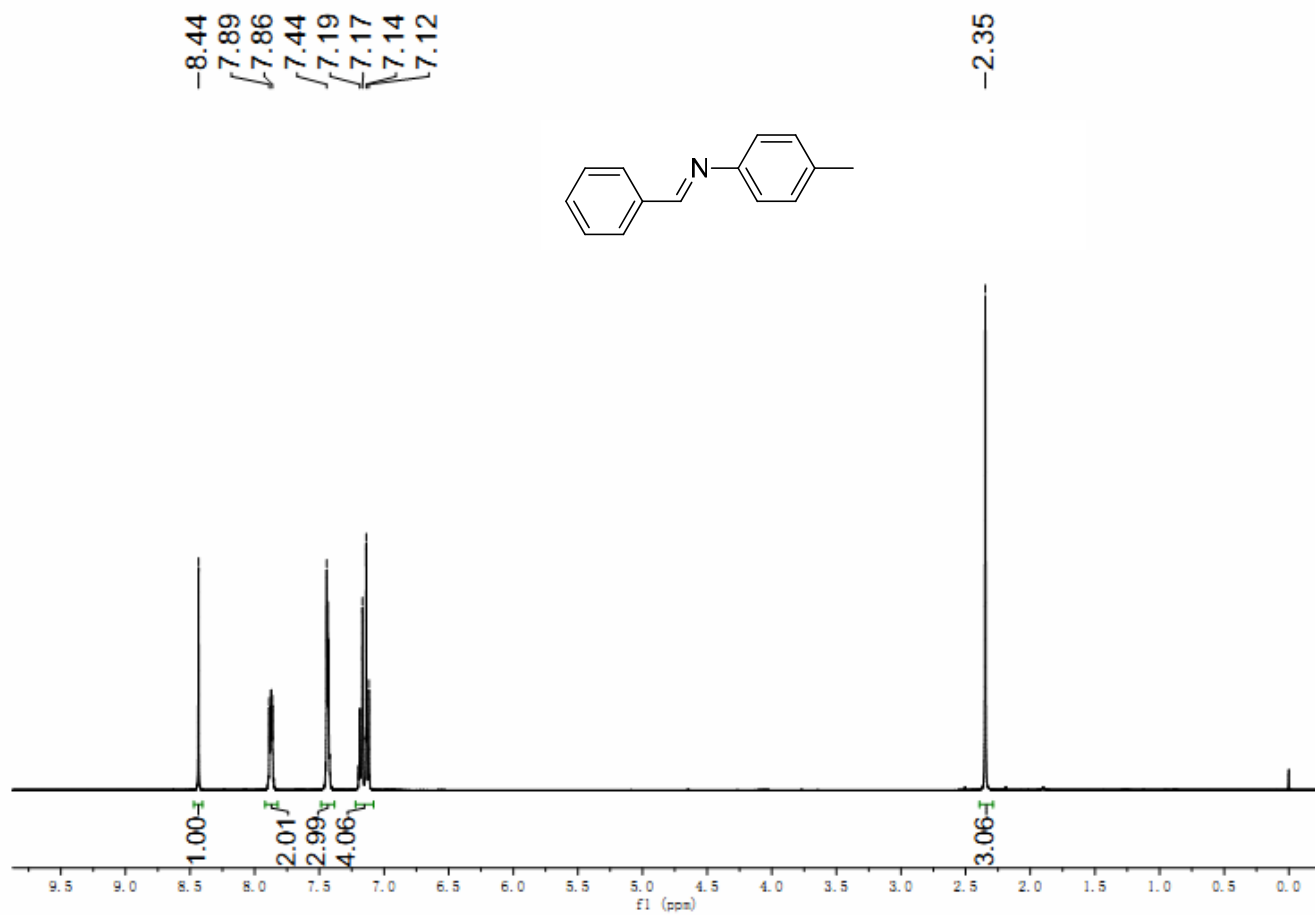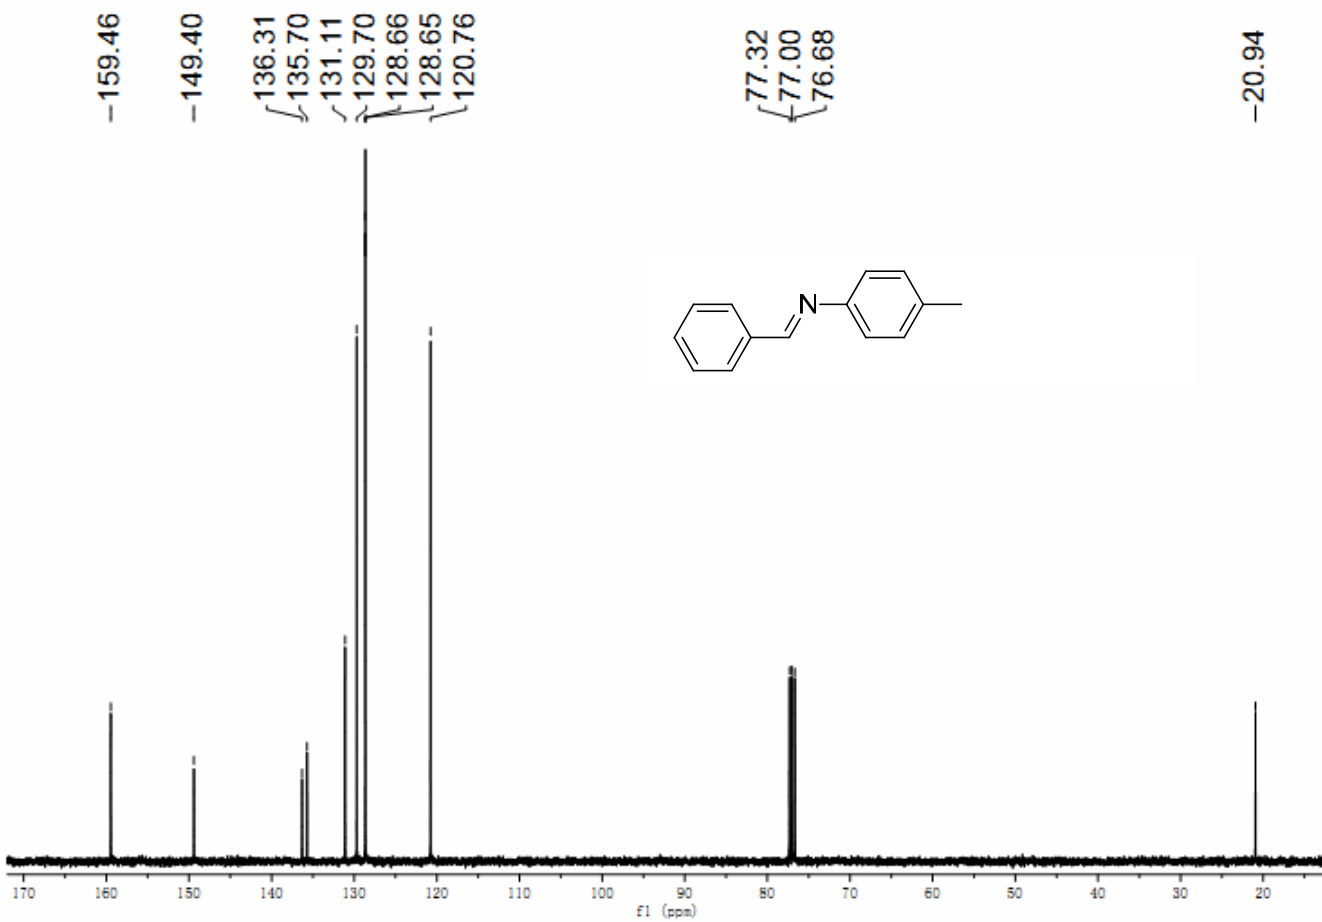

3d

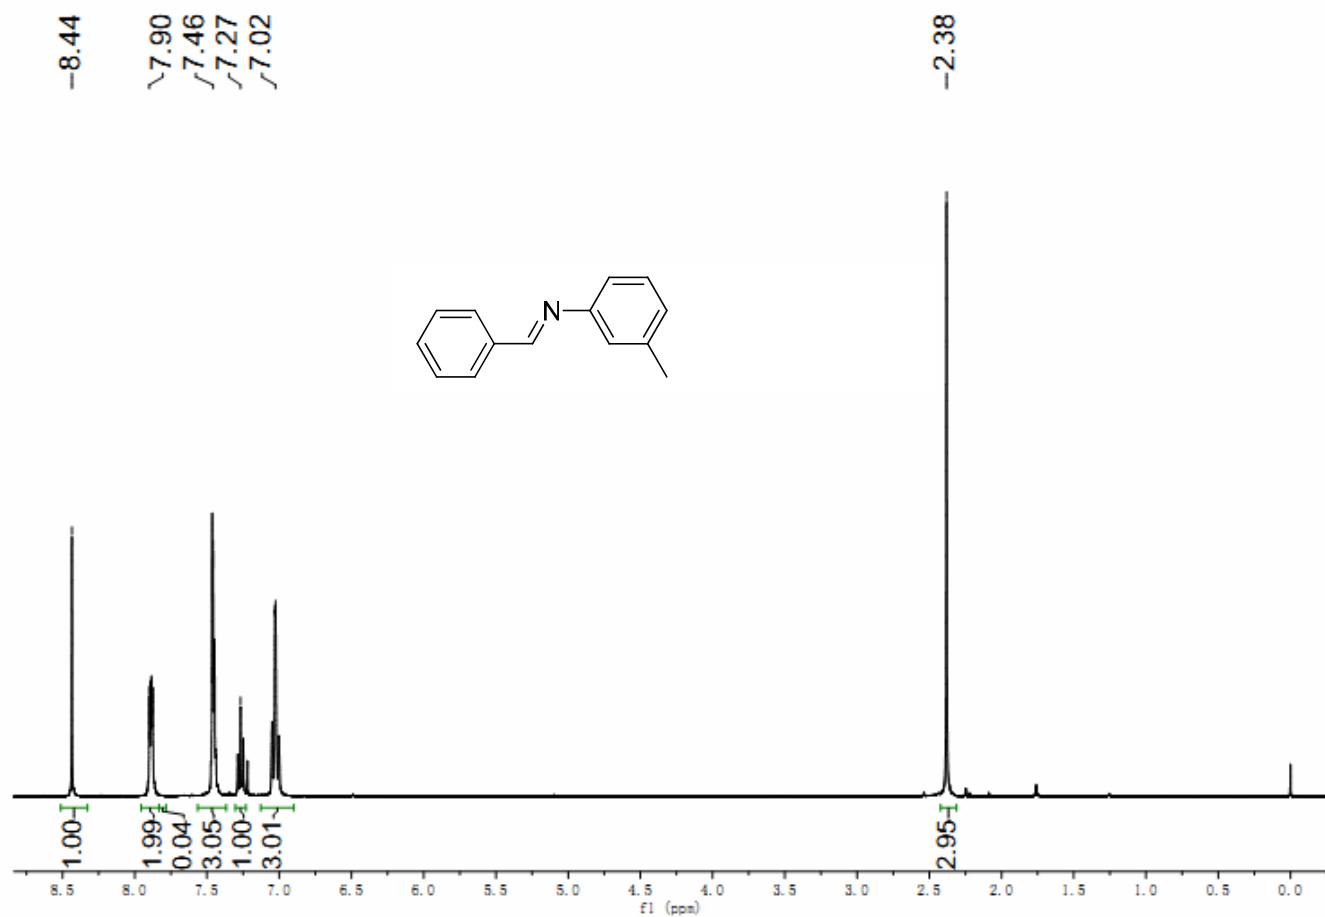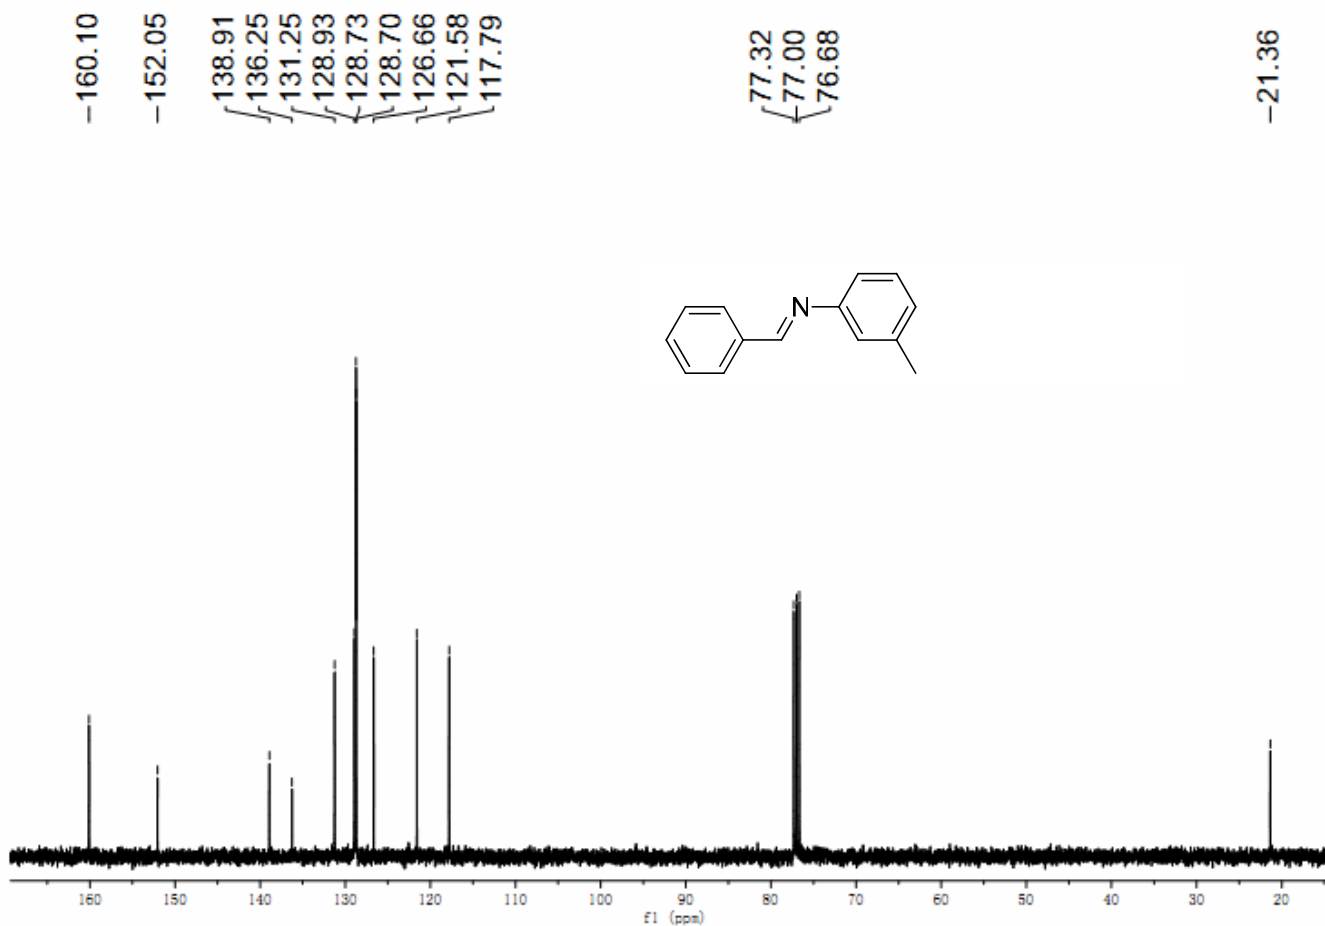



3e

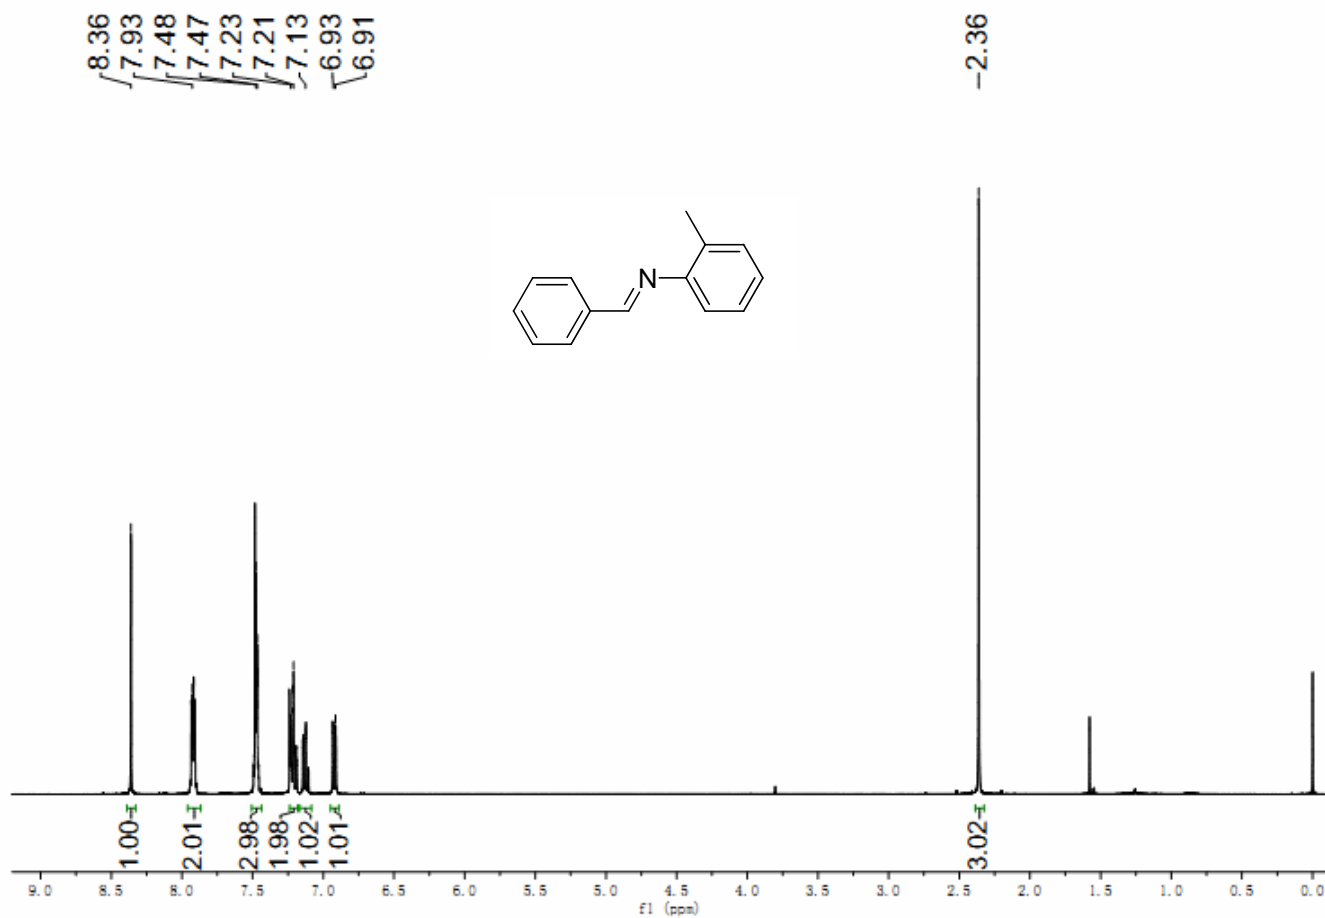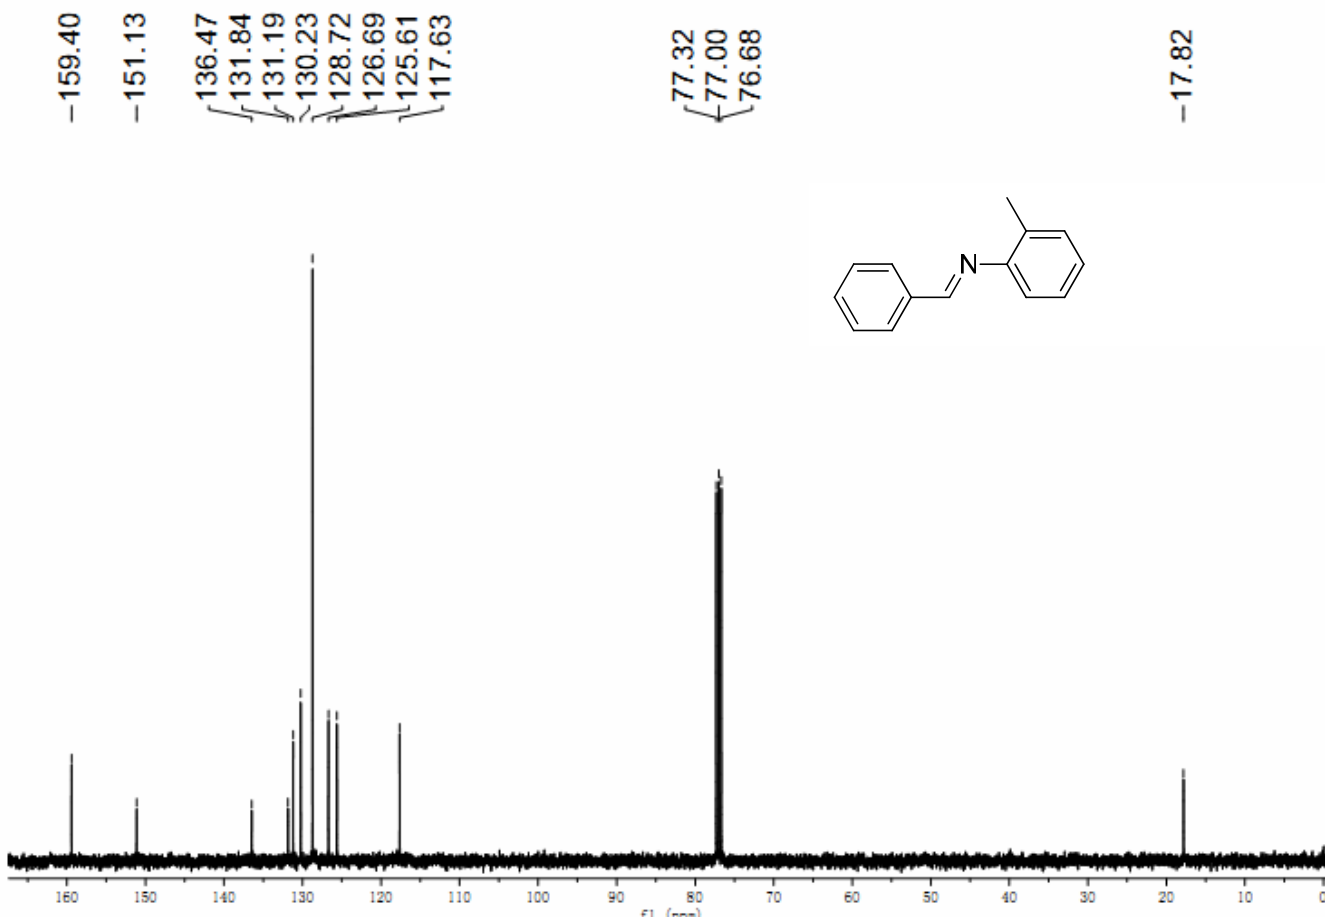

3f

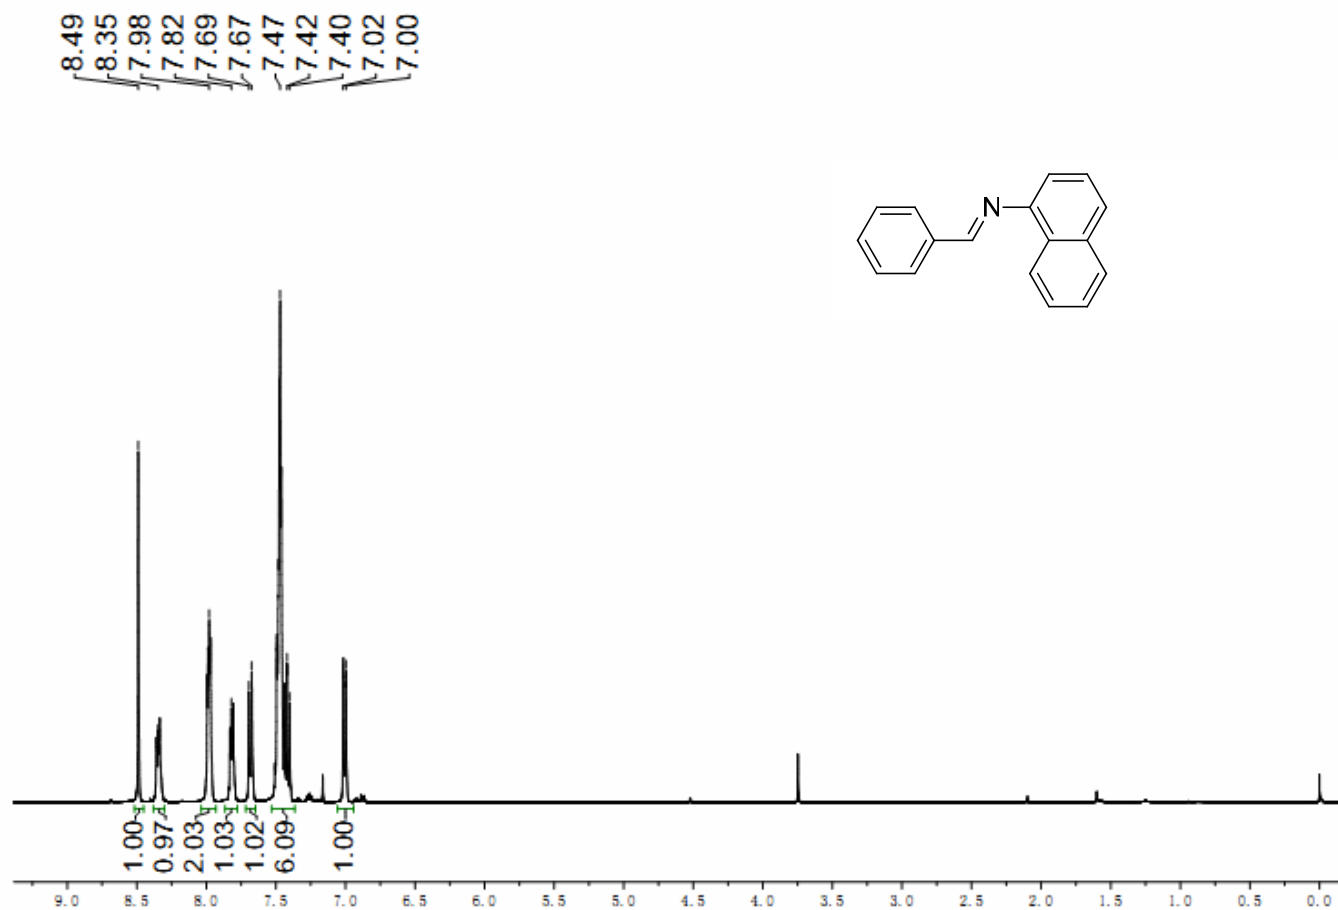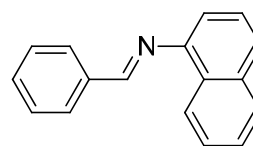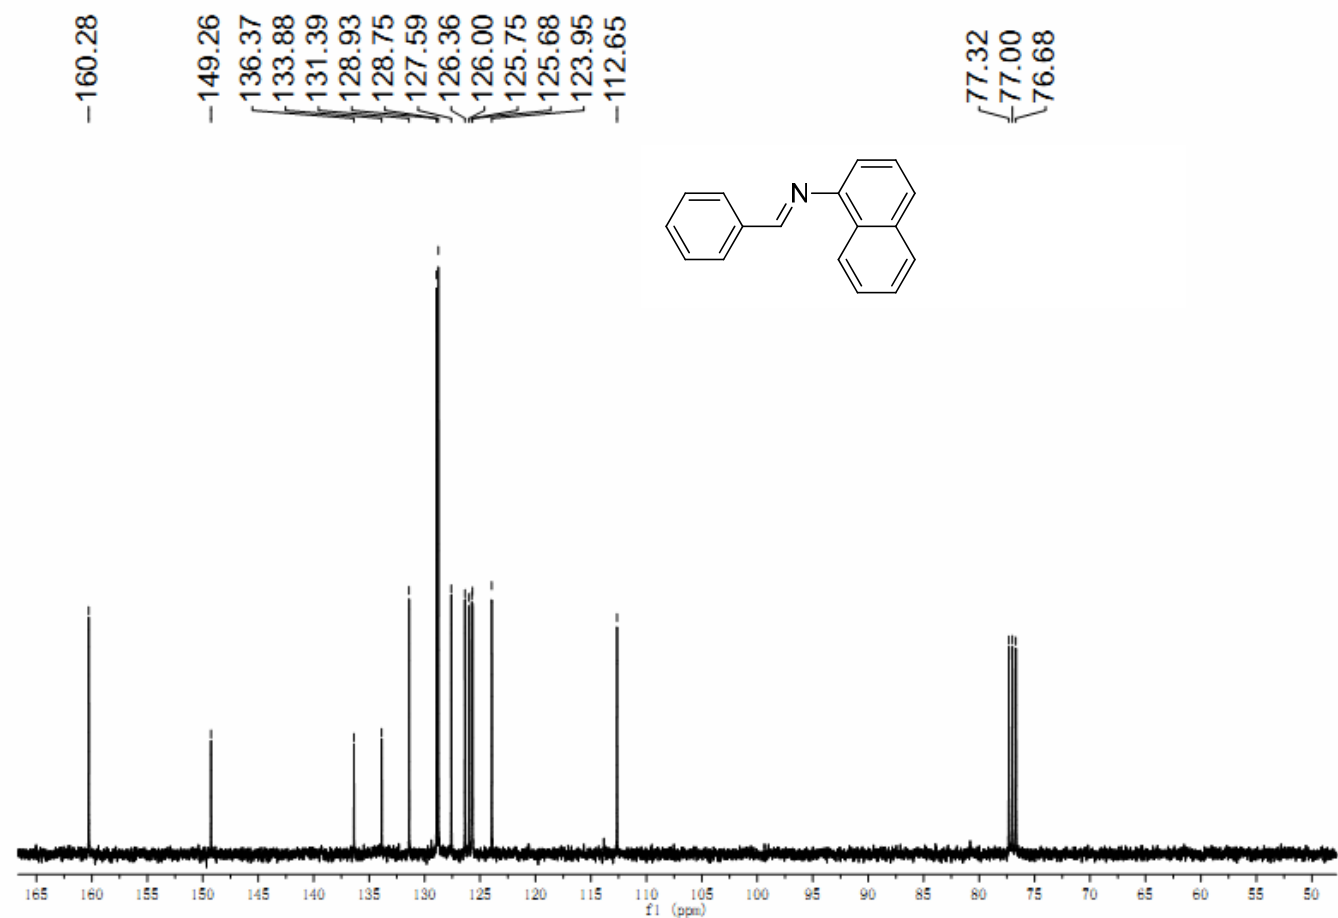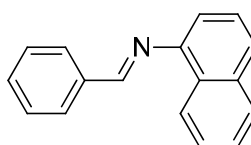

3g

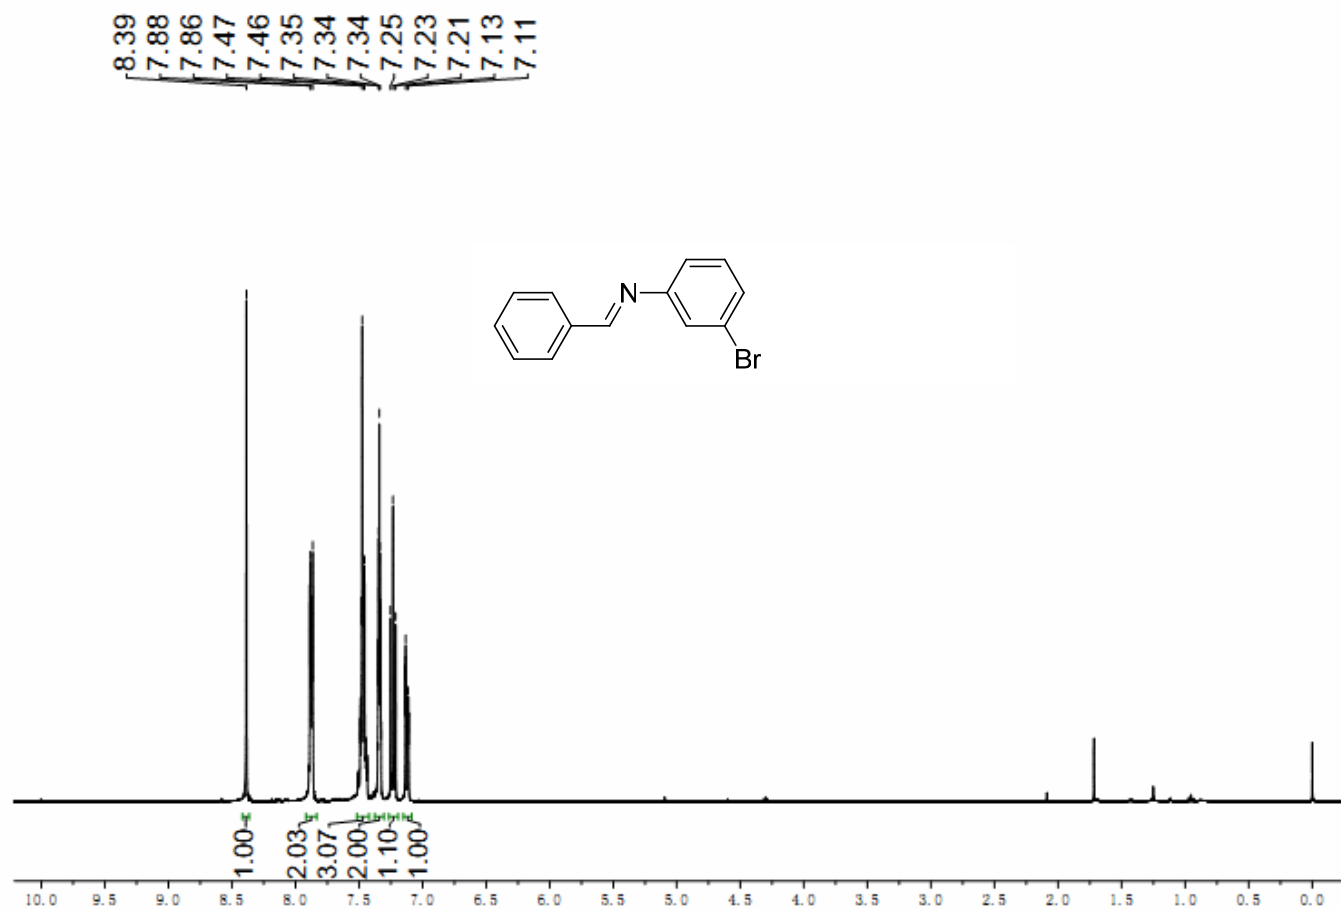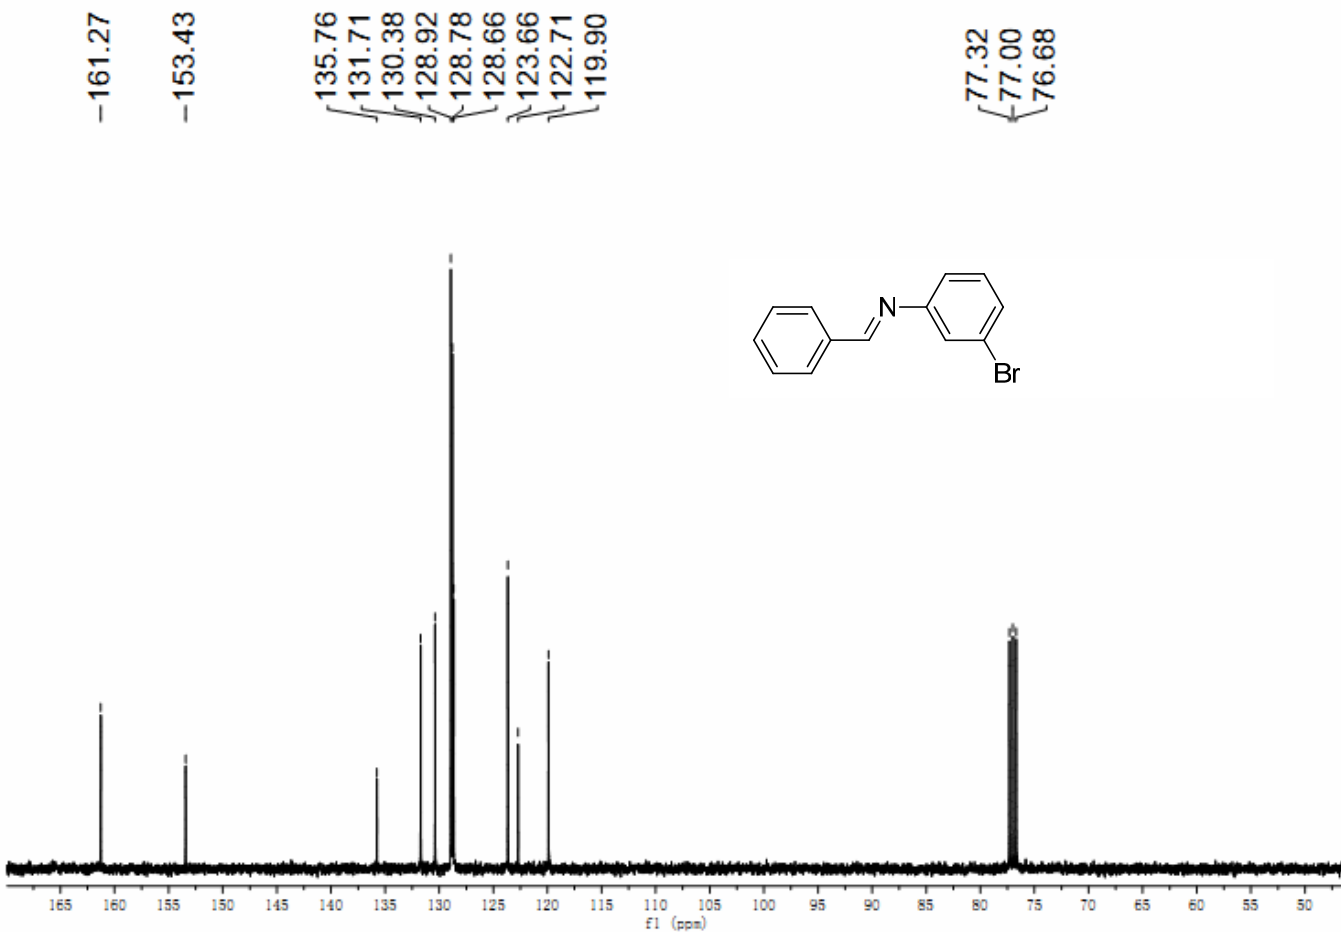

3h

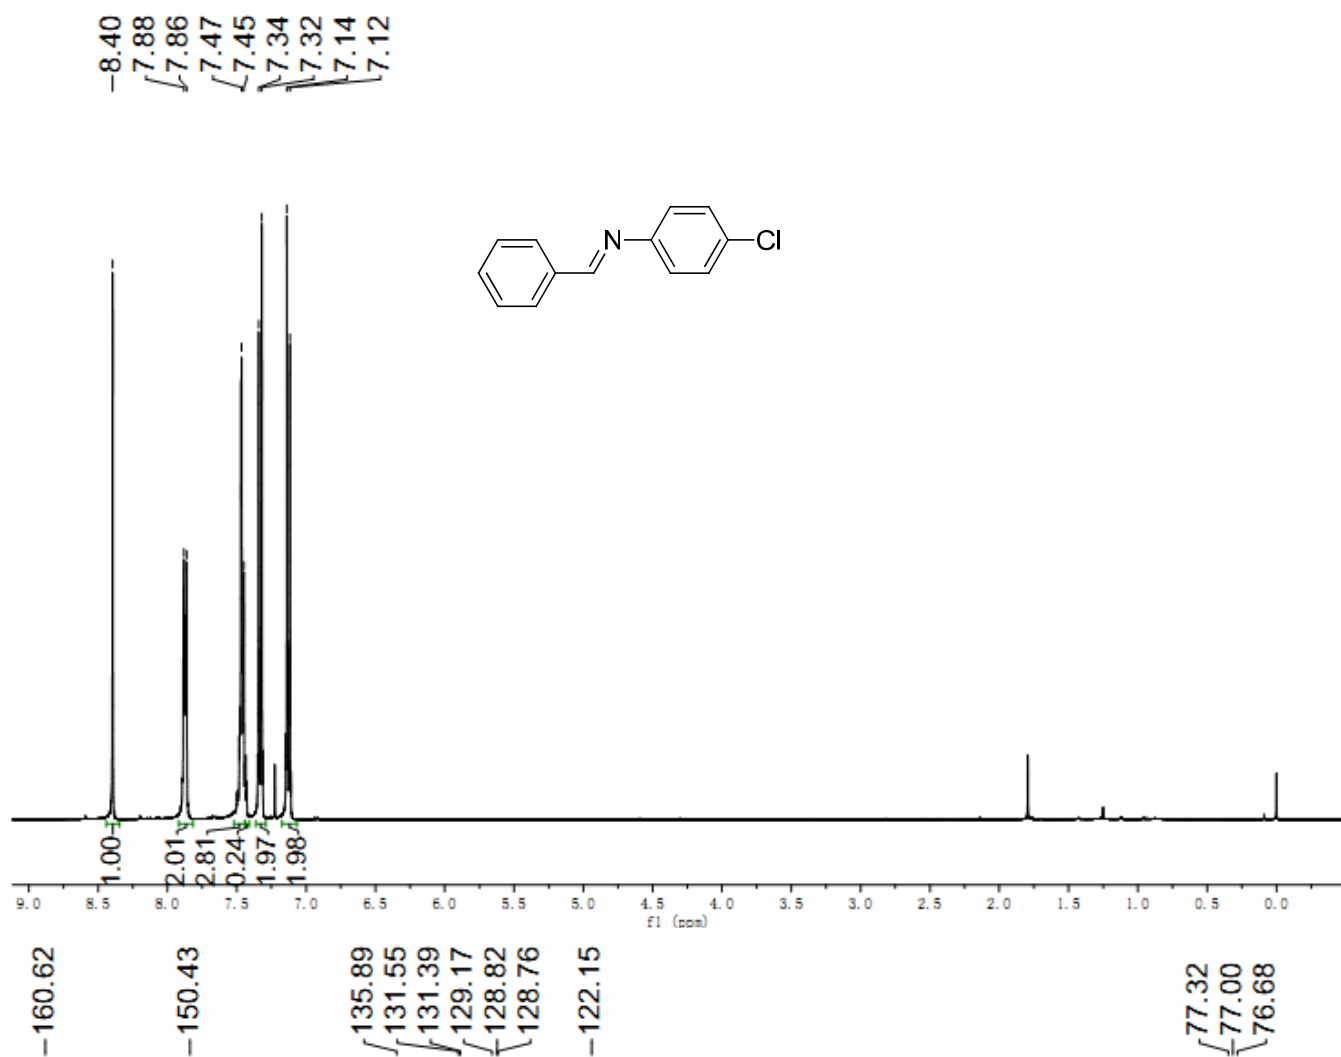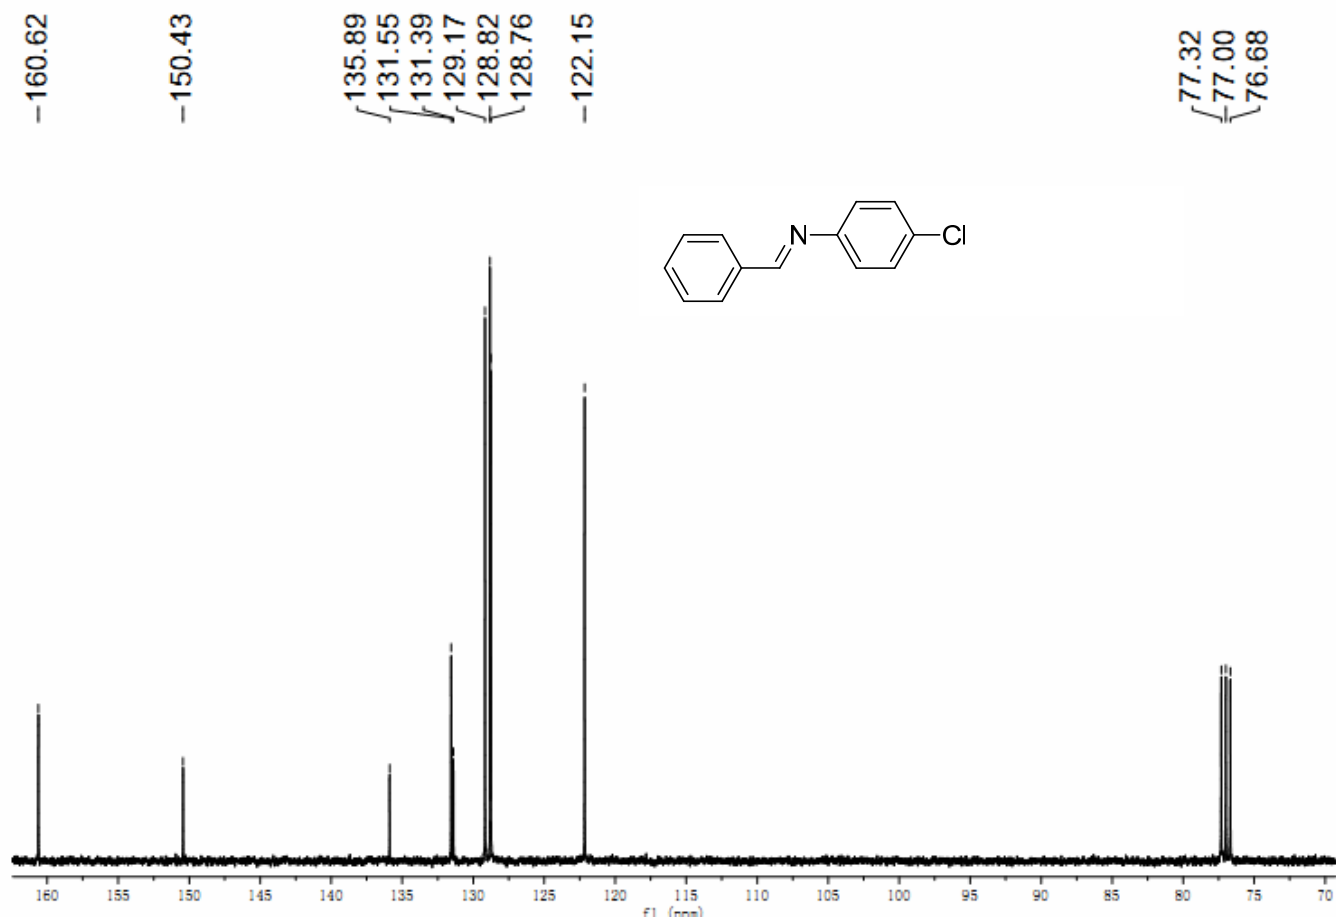

3i

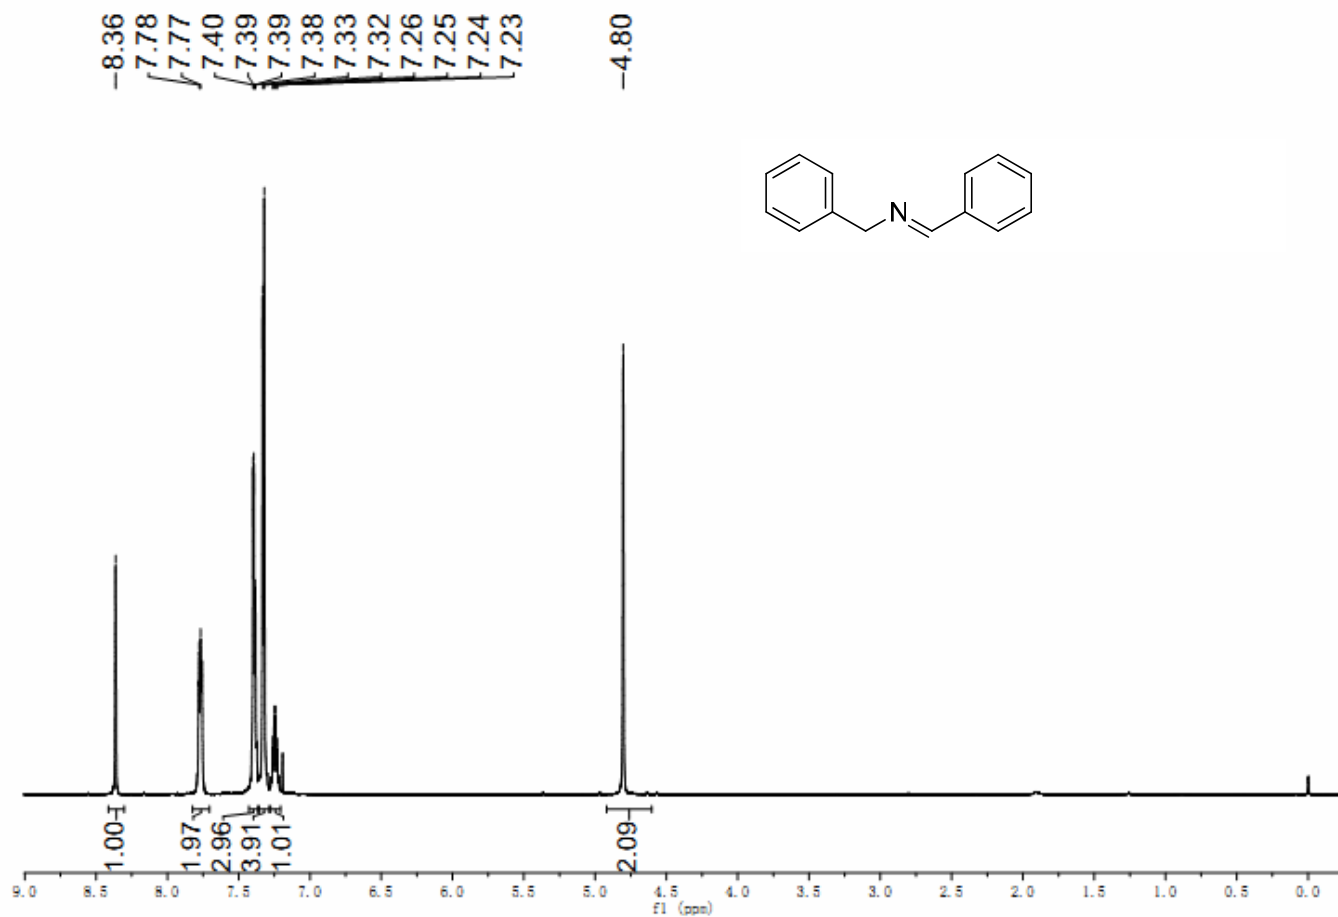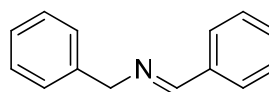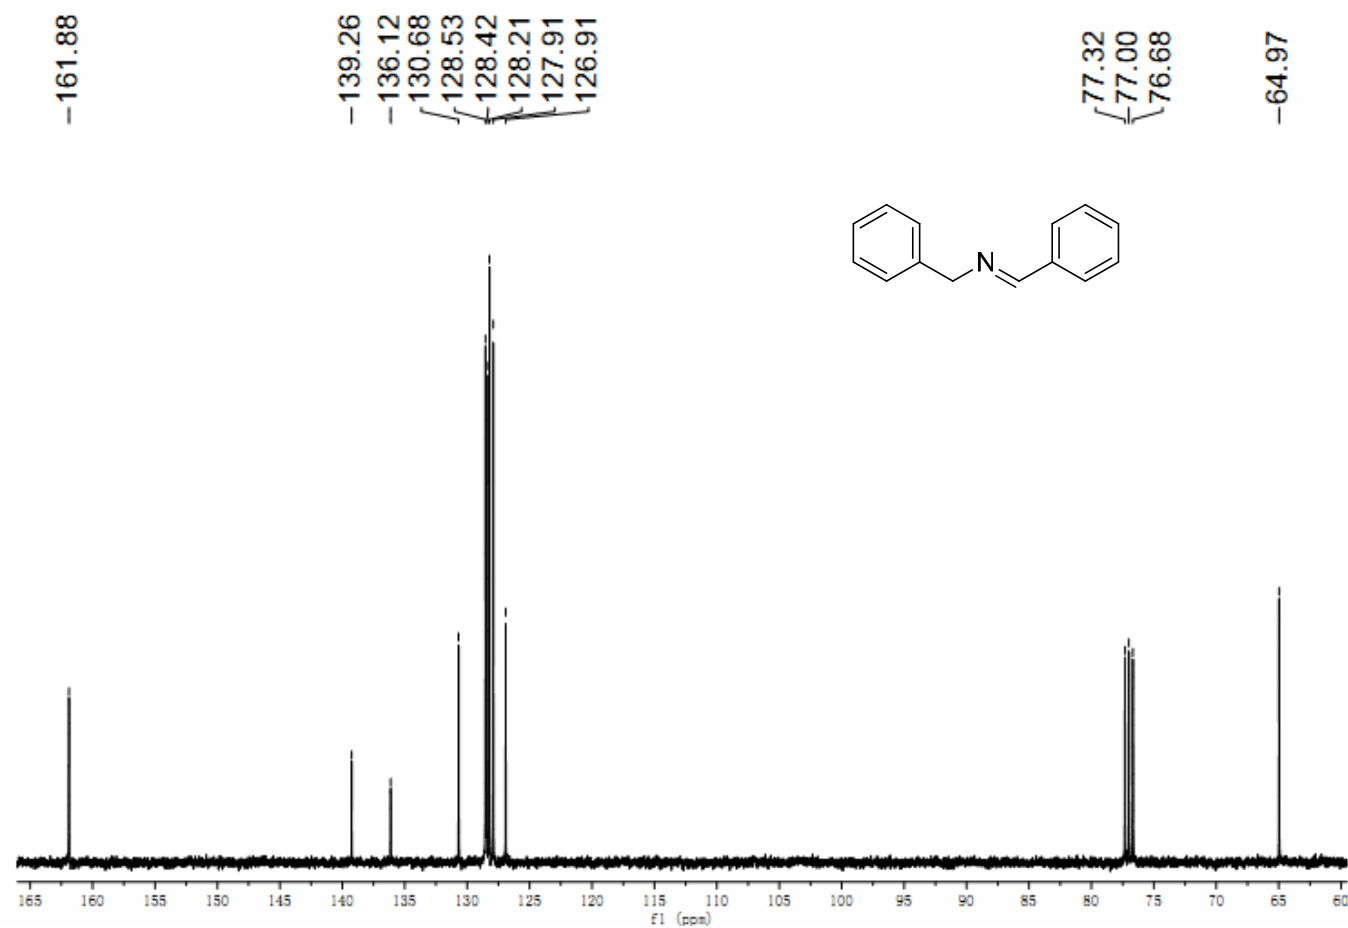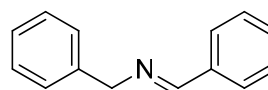

3j

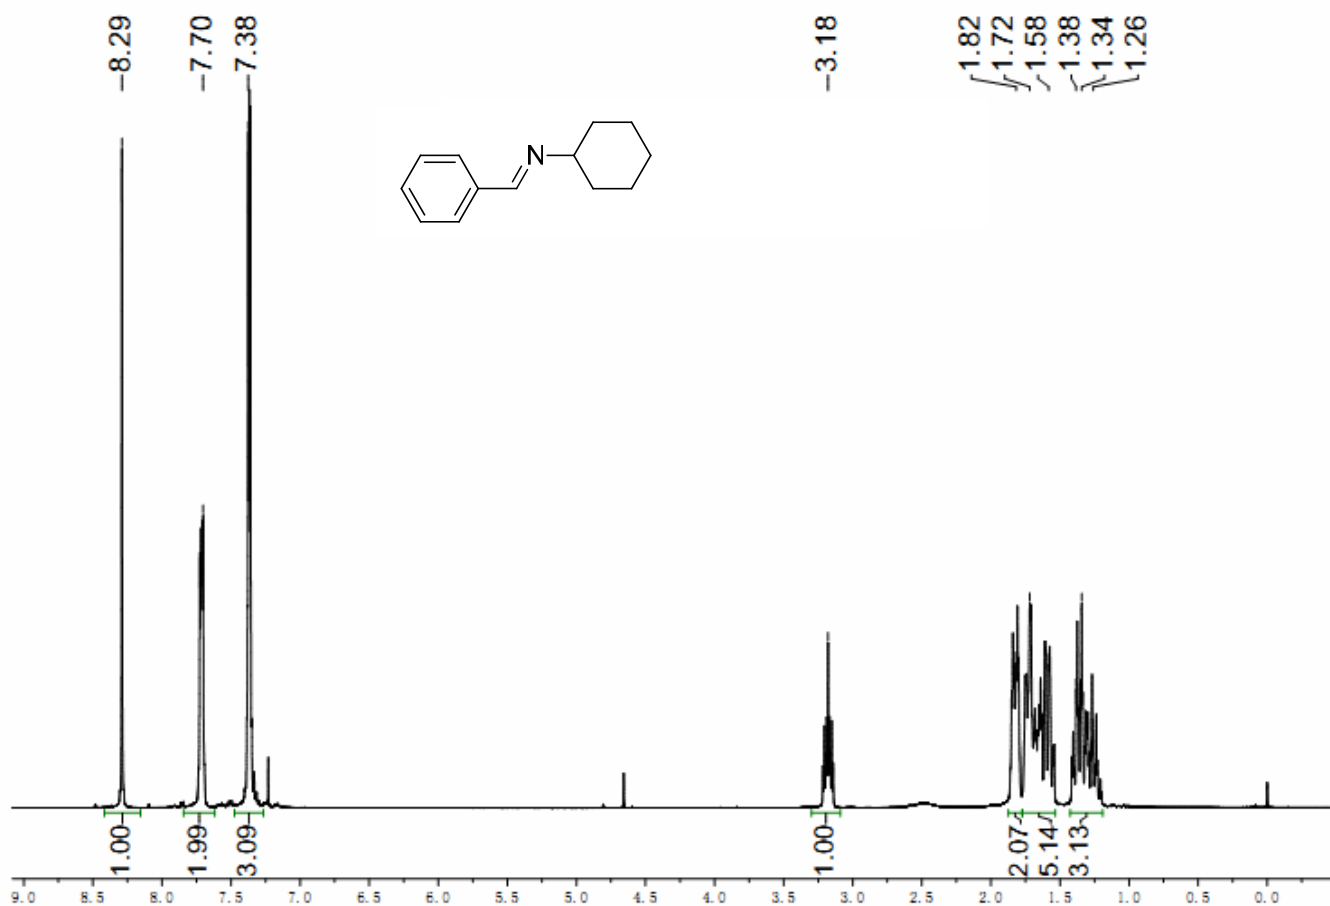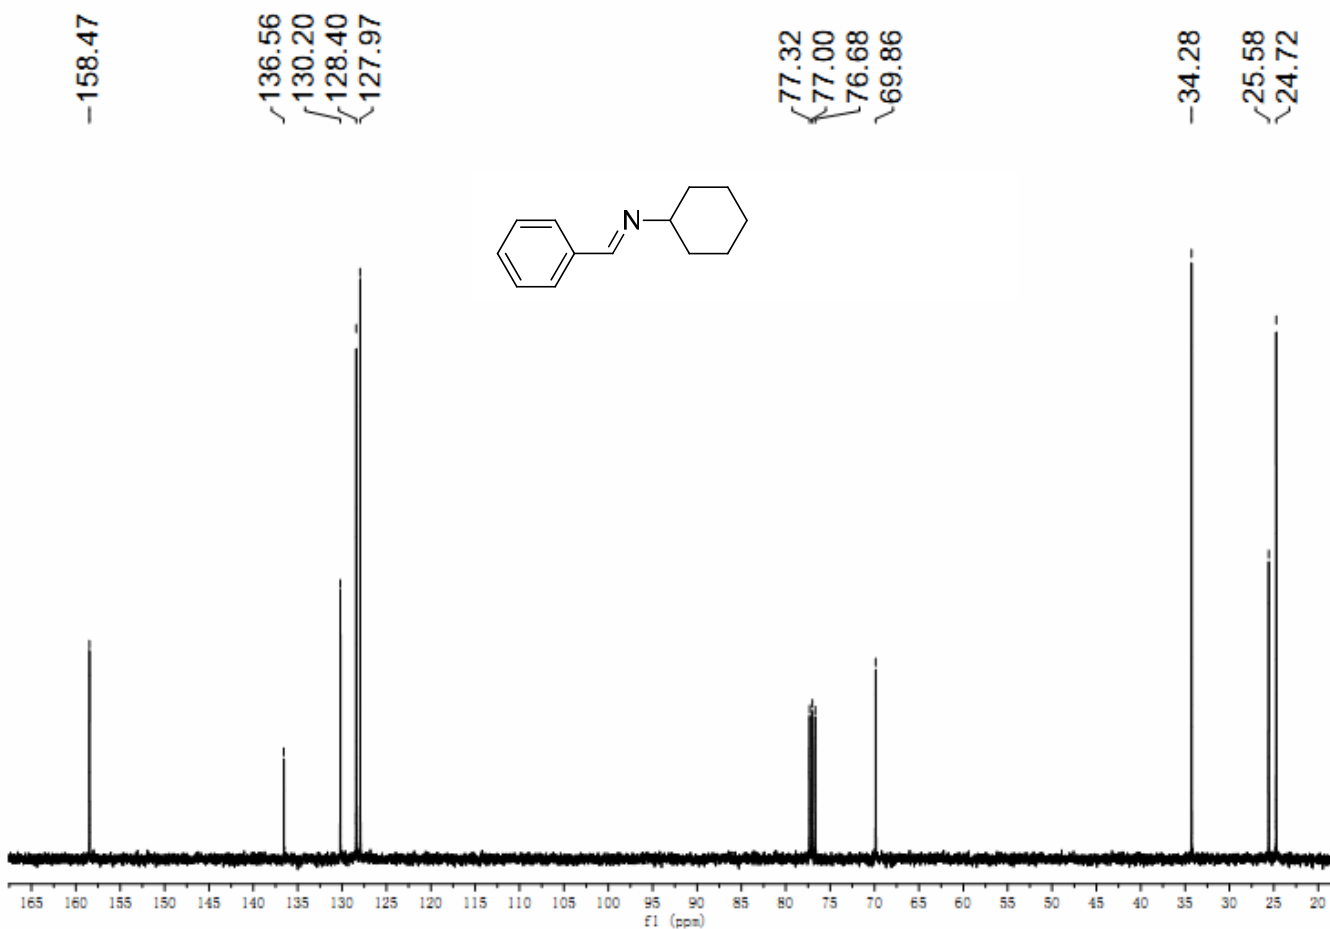

3k

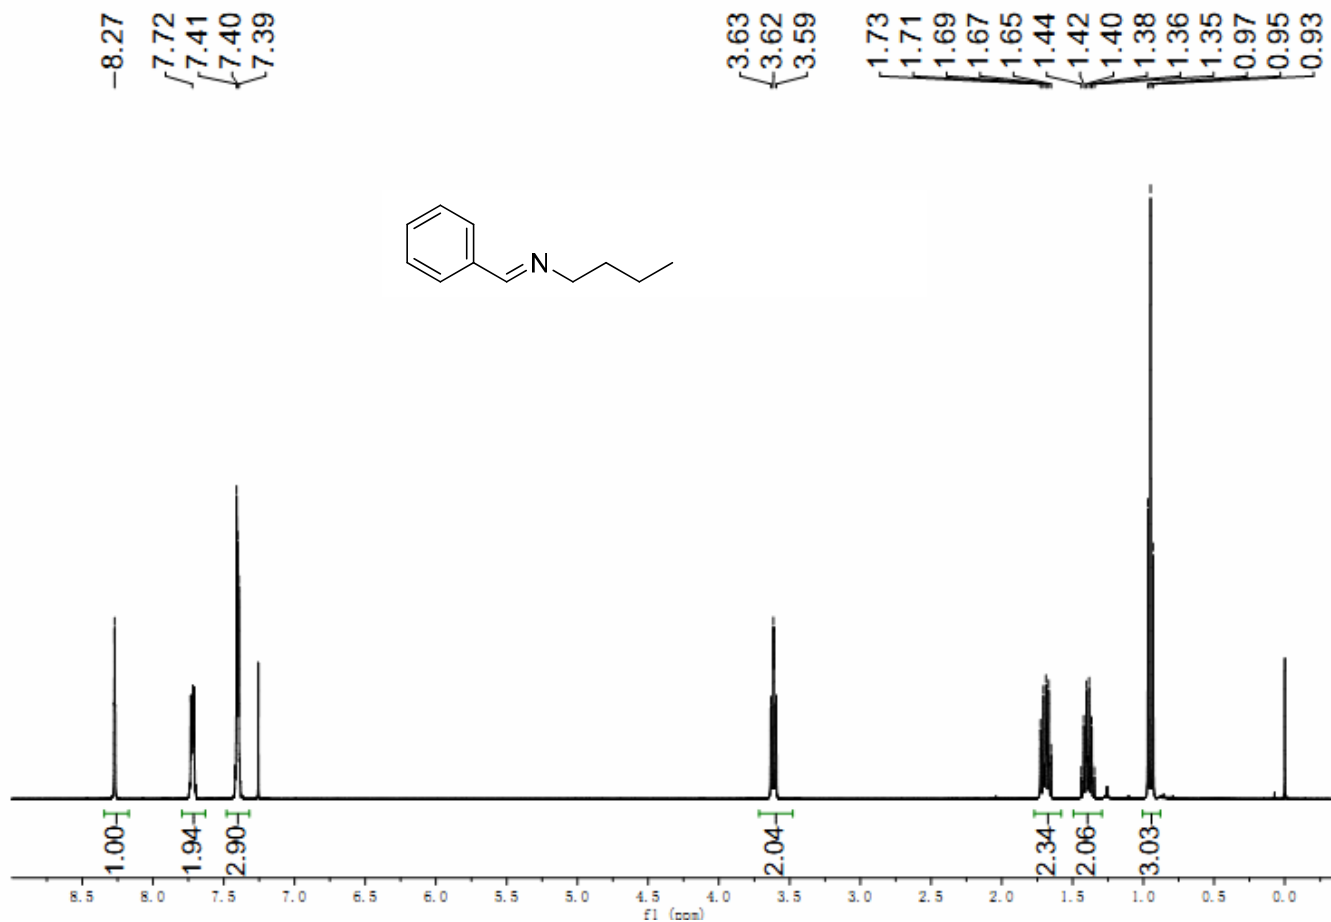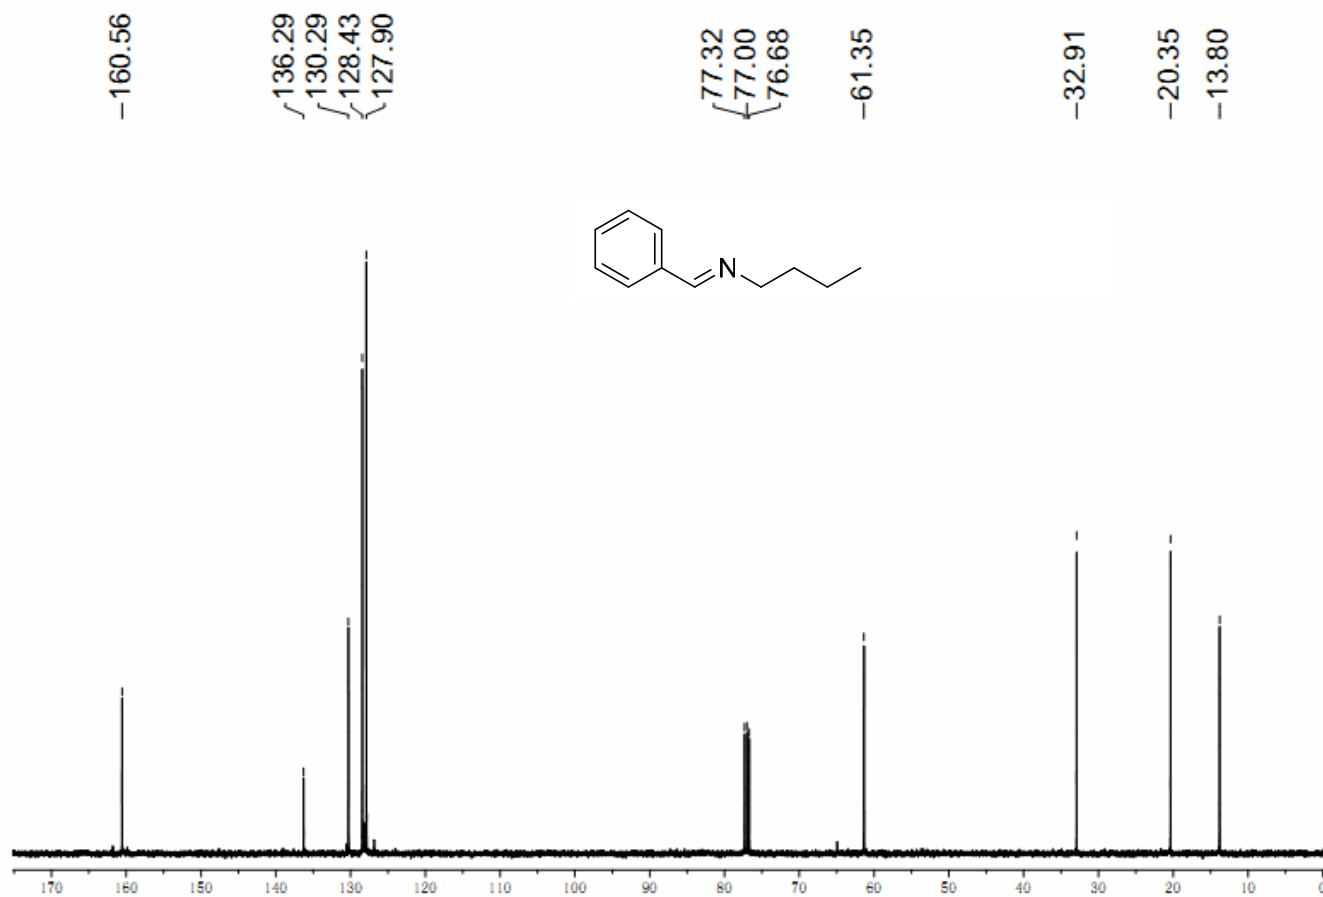

31

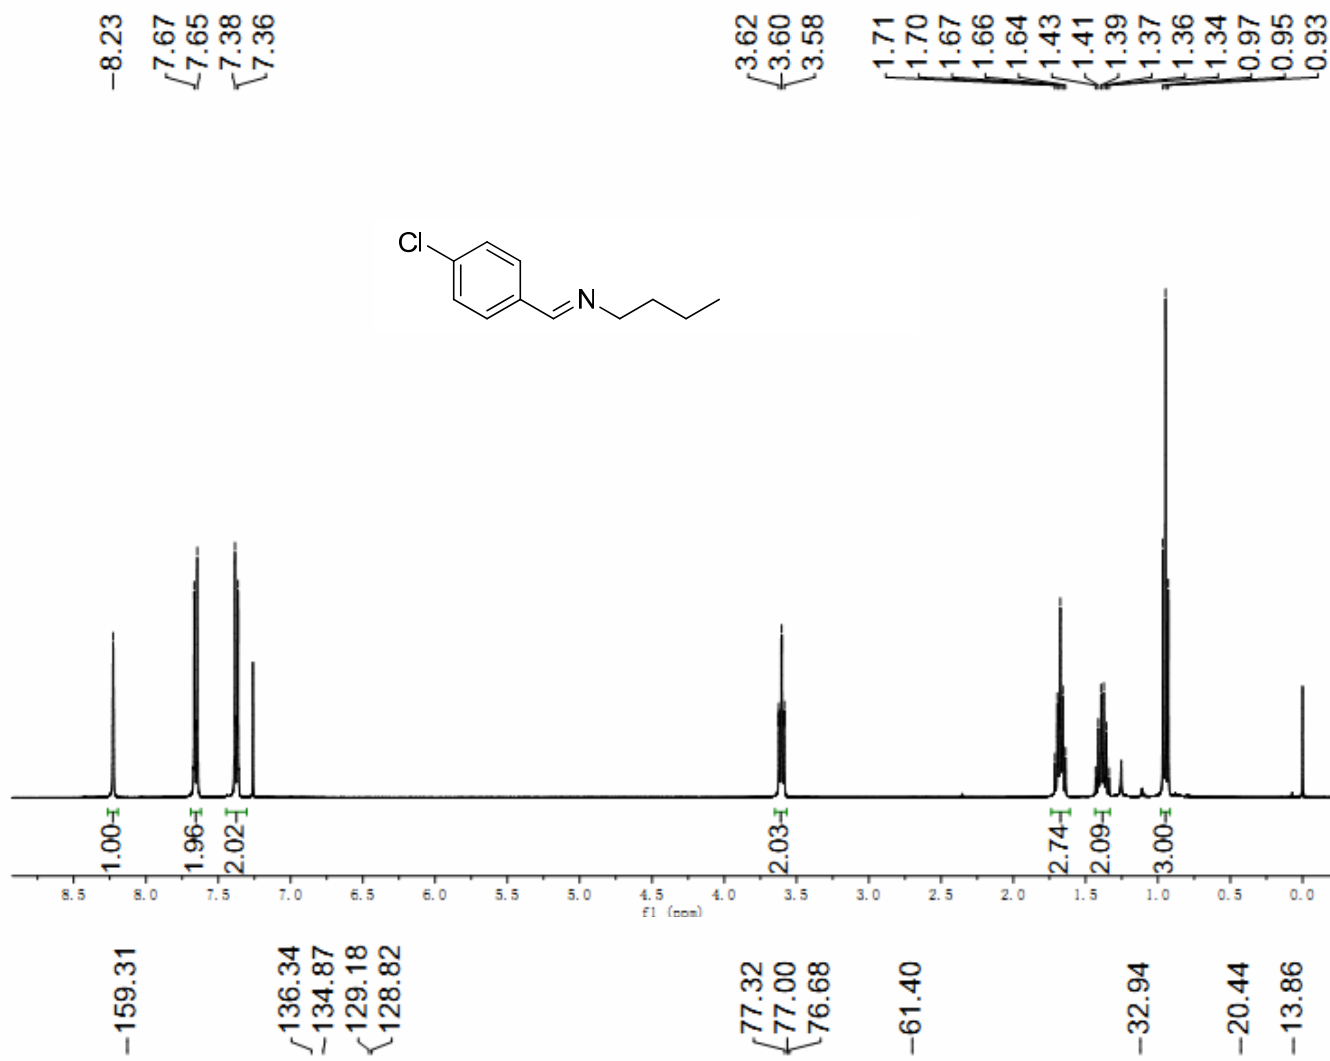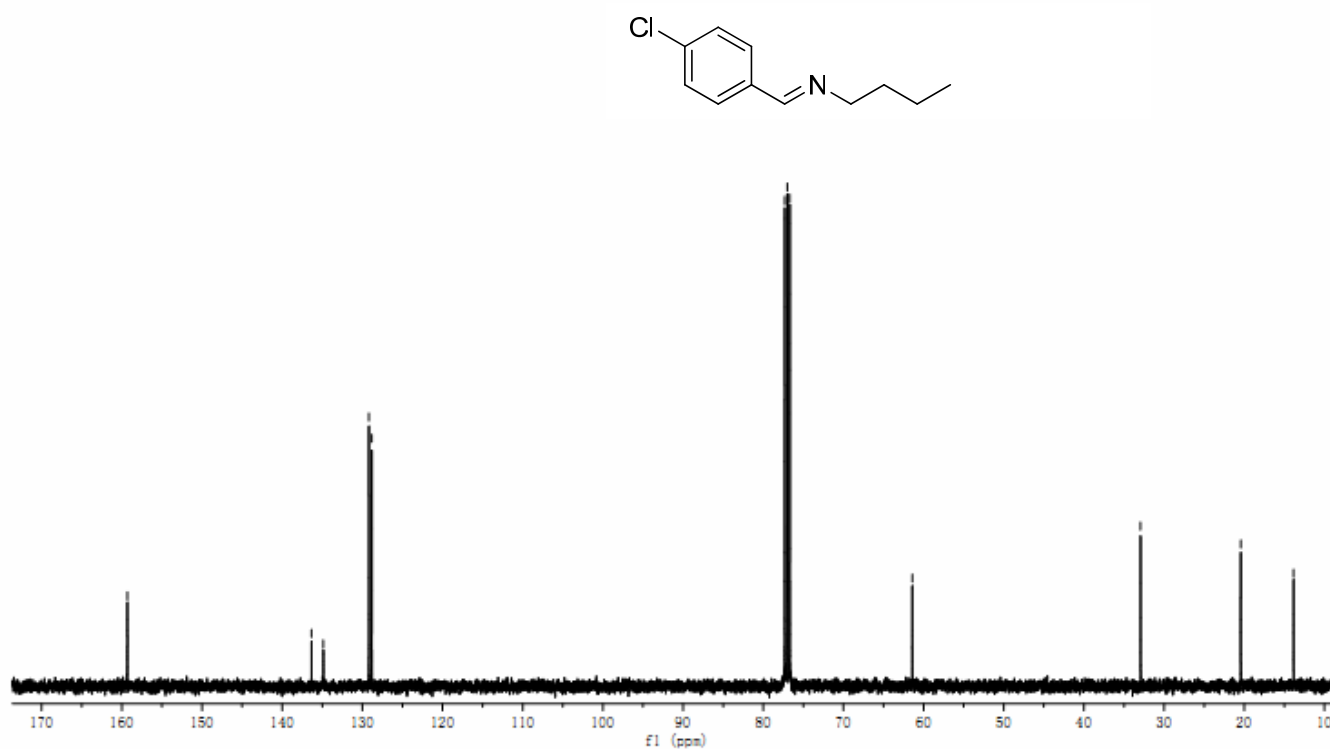



3m

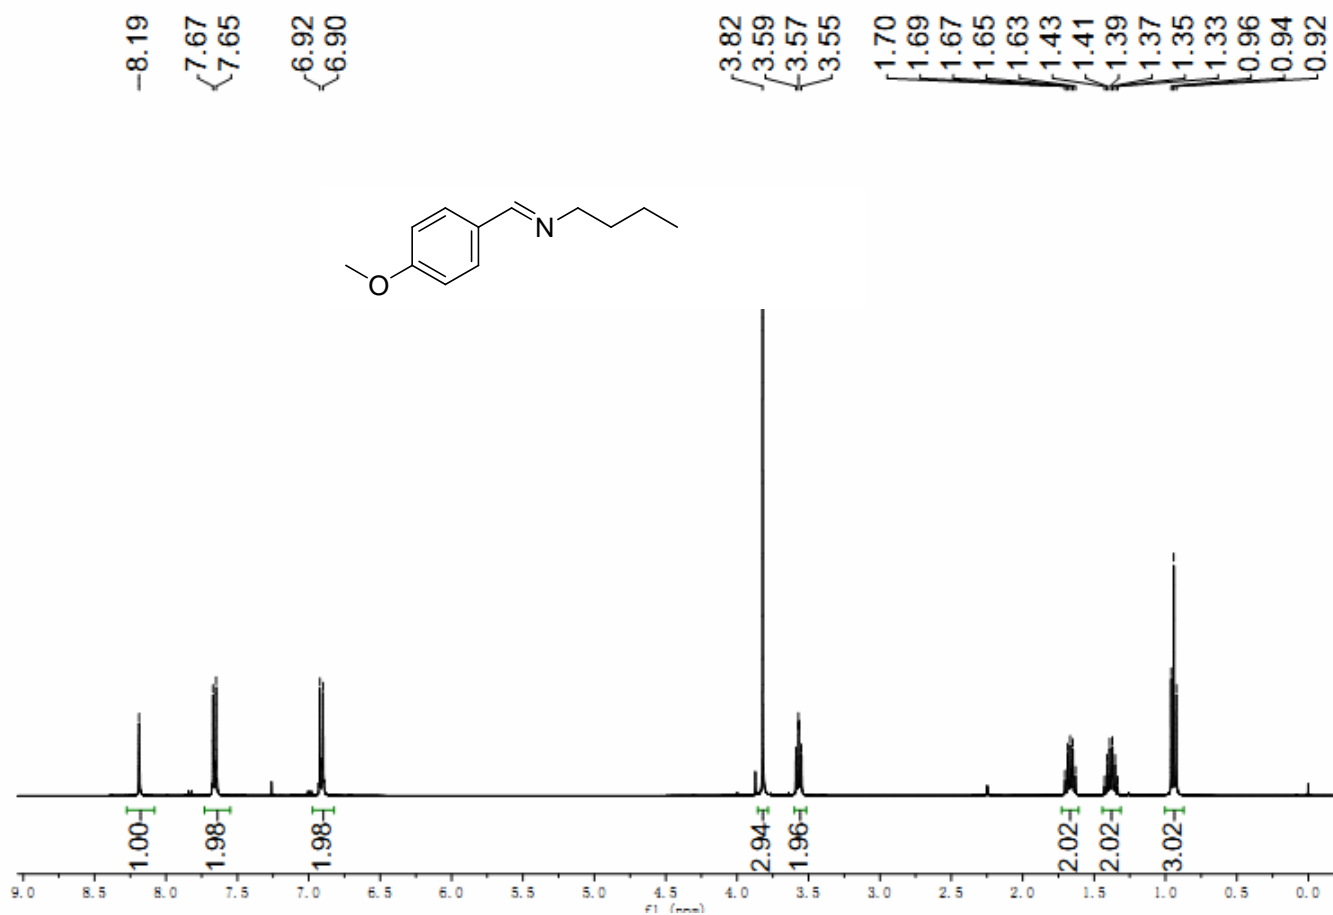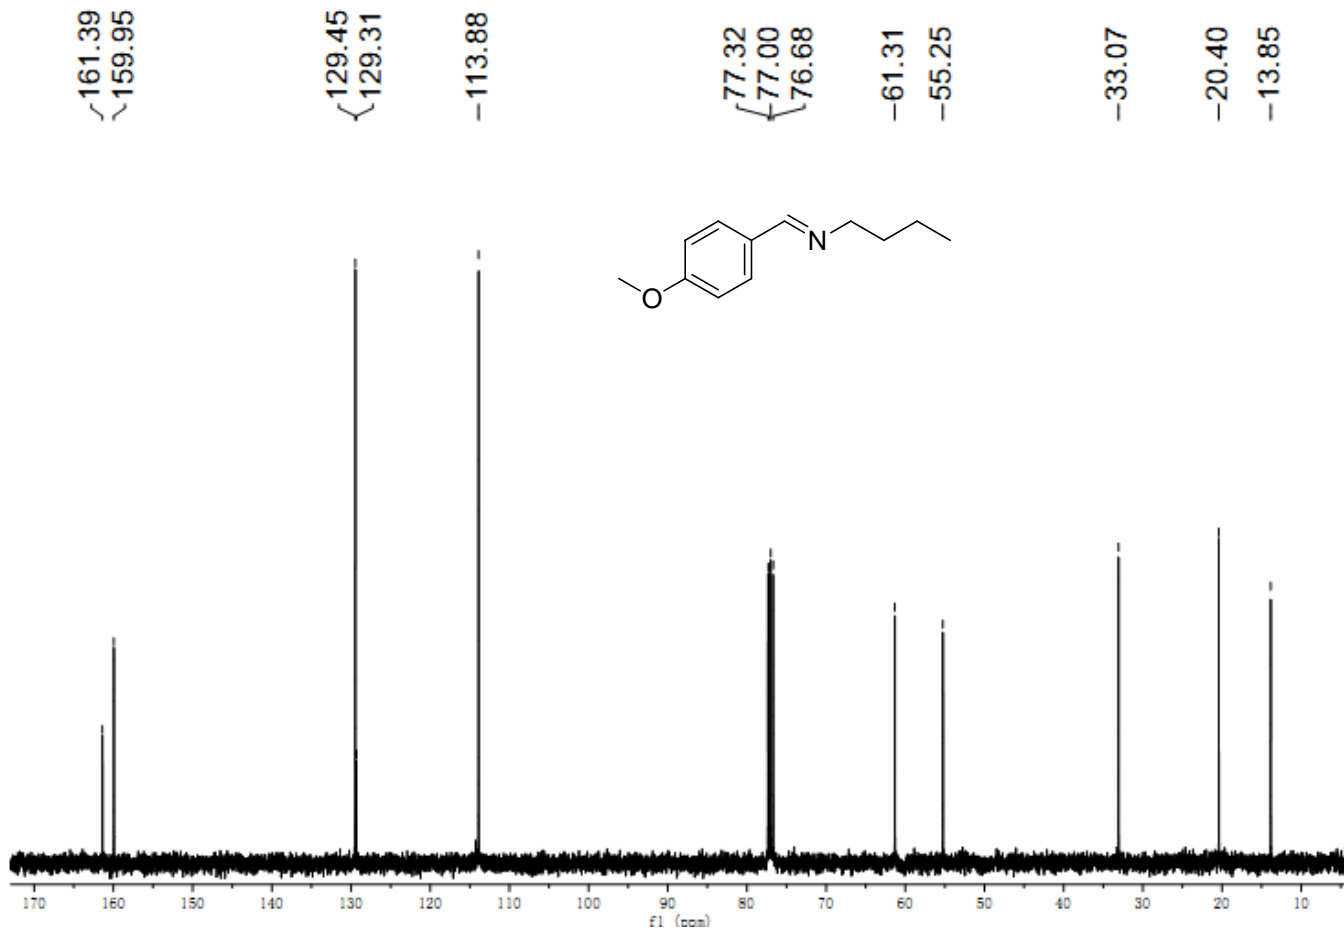

3n

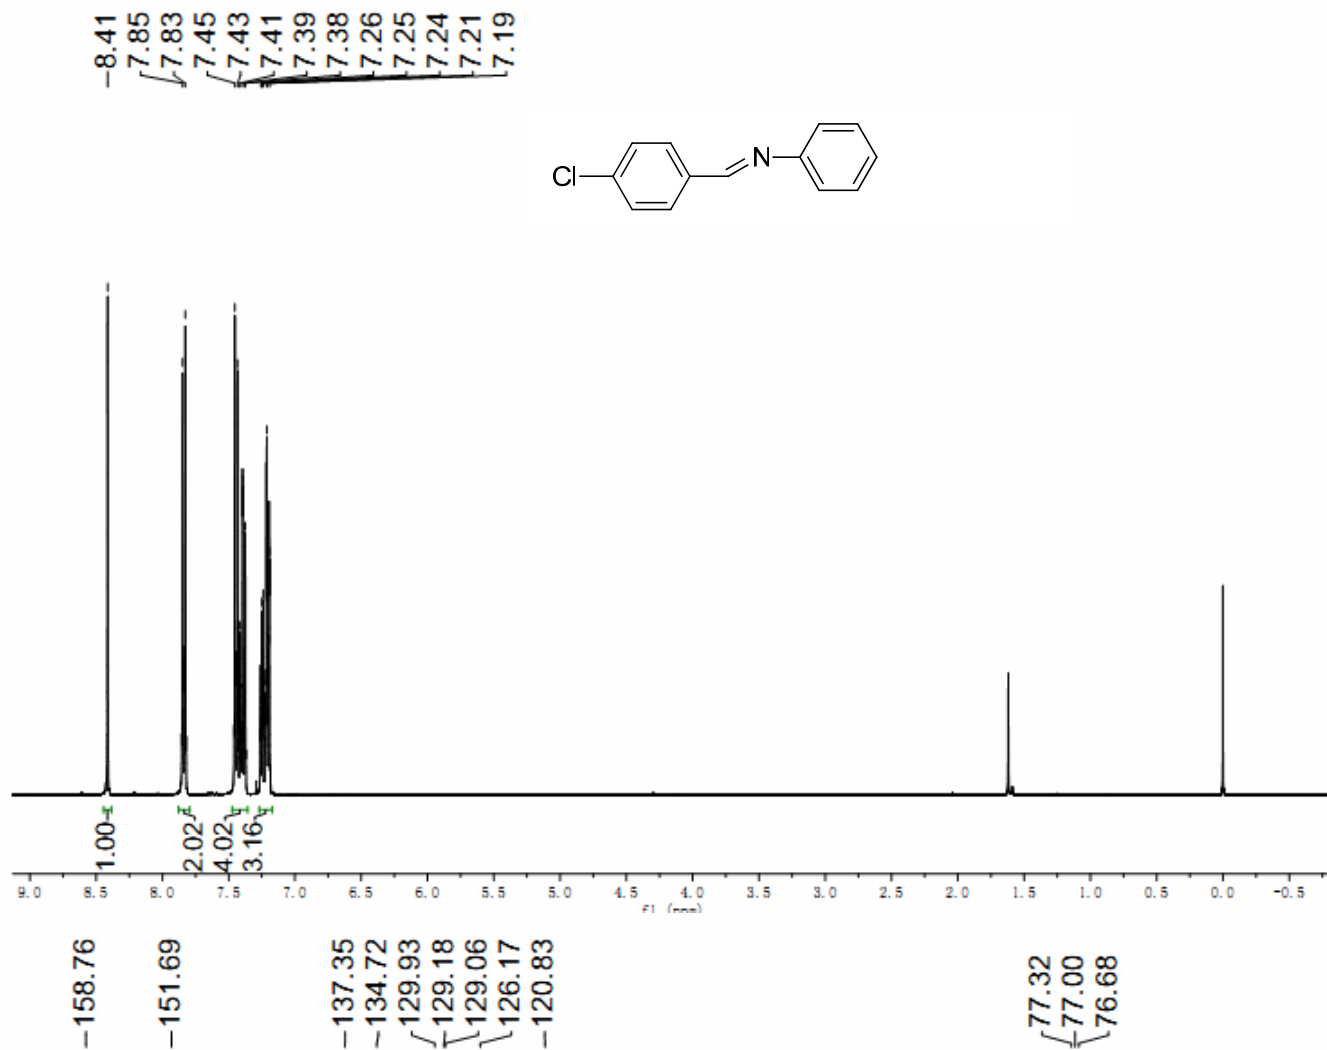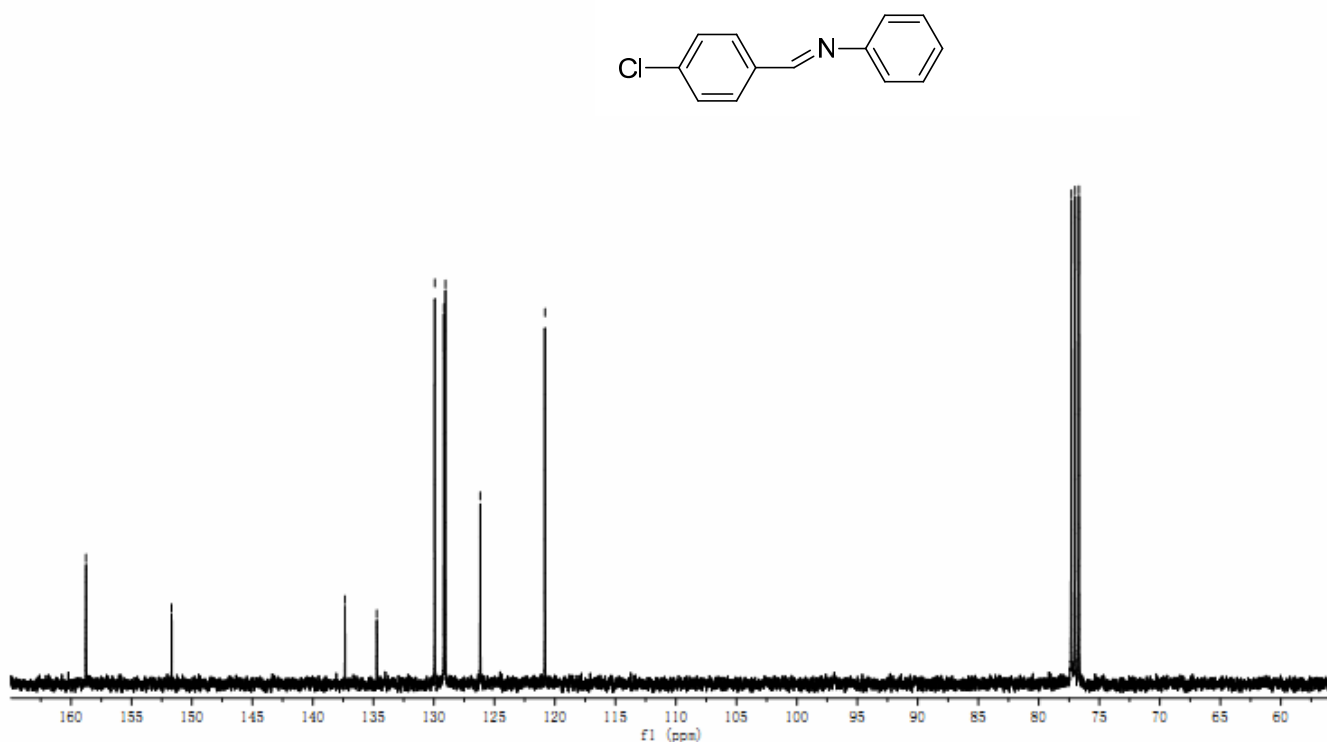

30

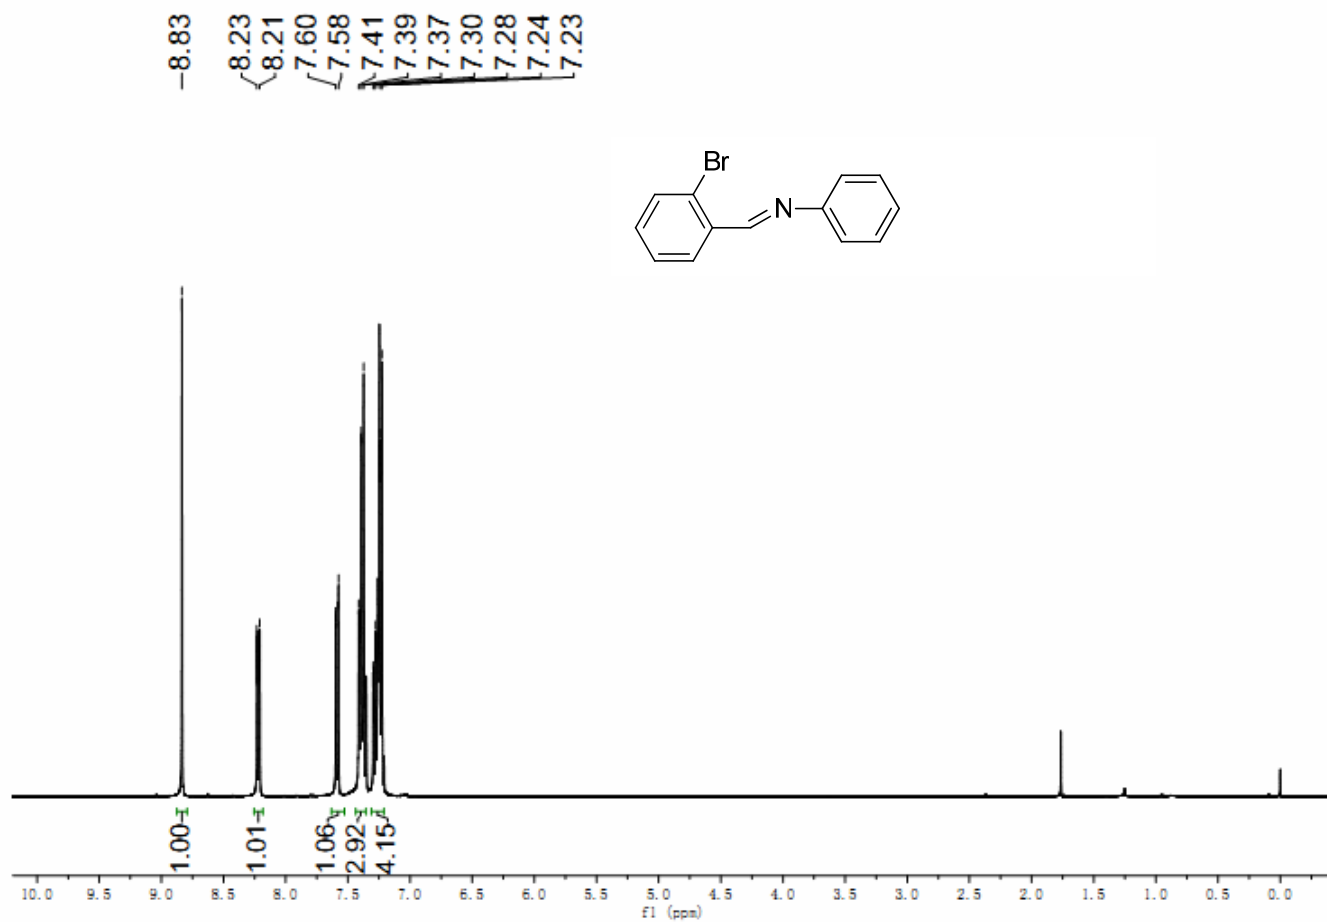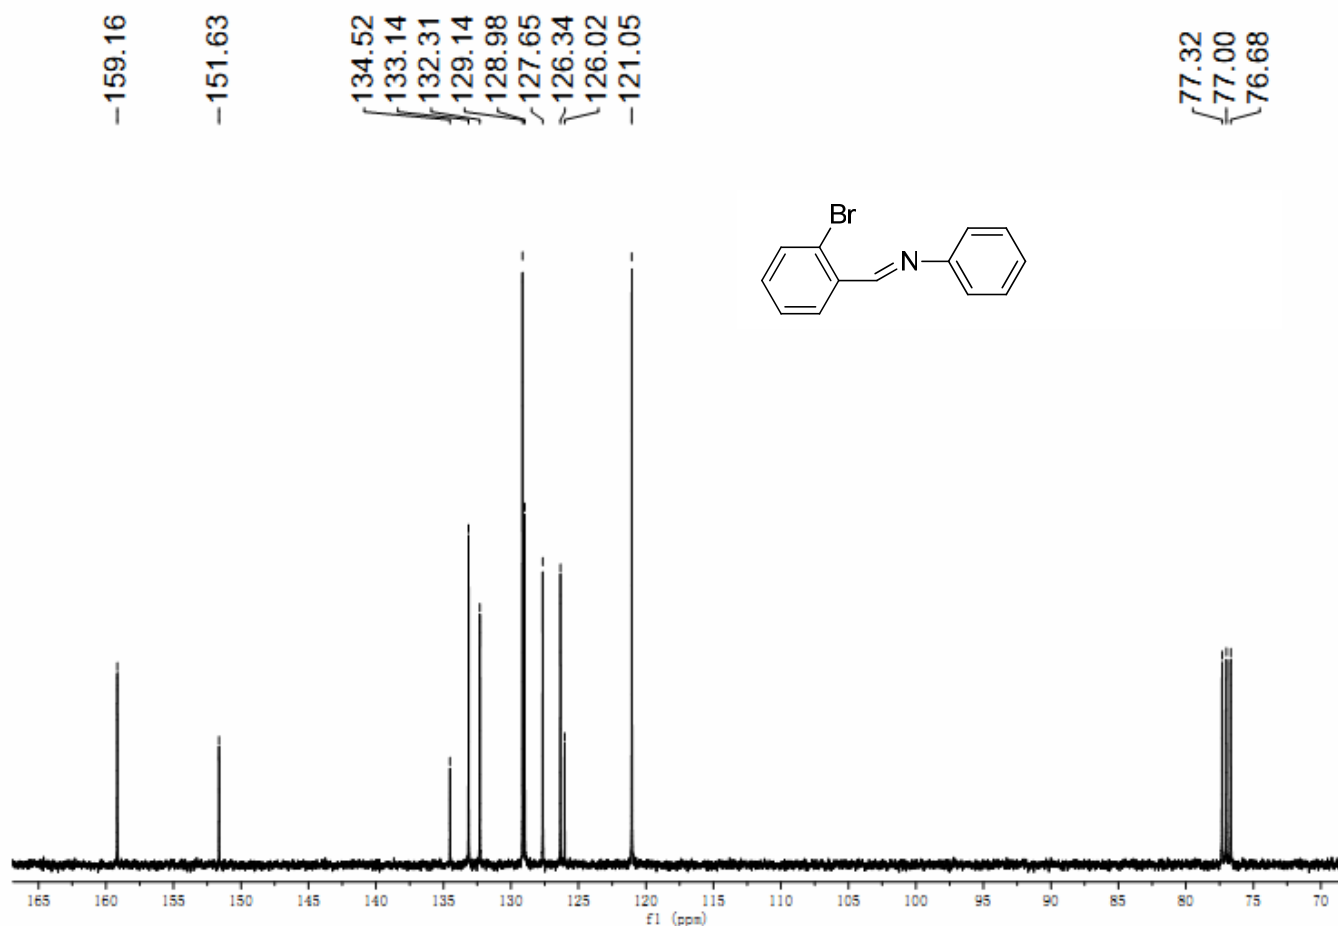

3p

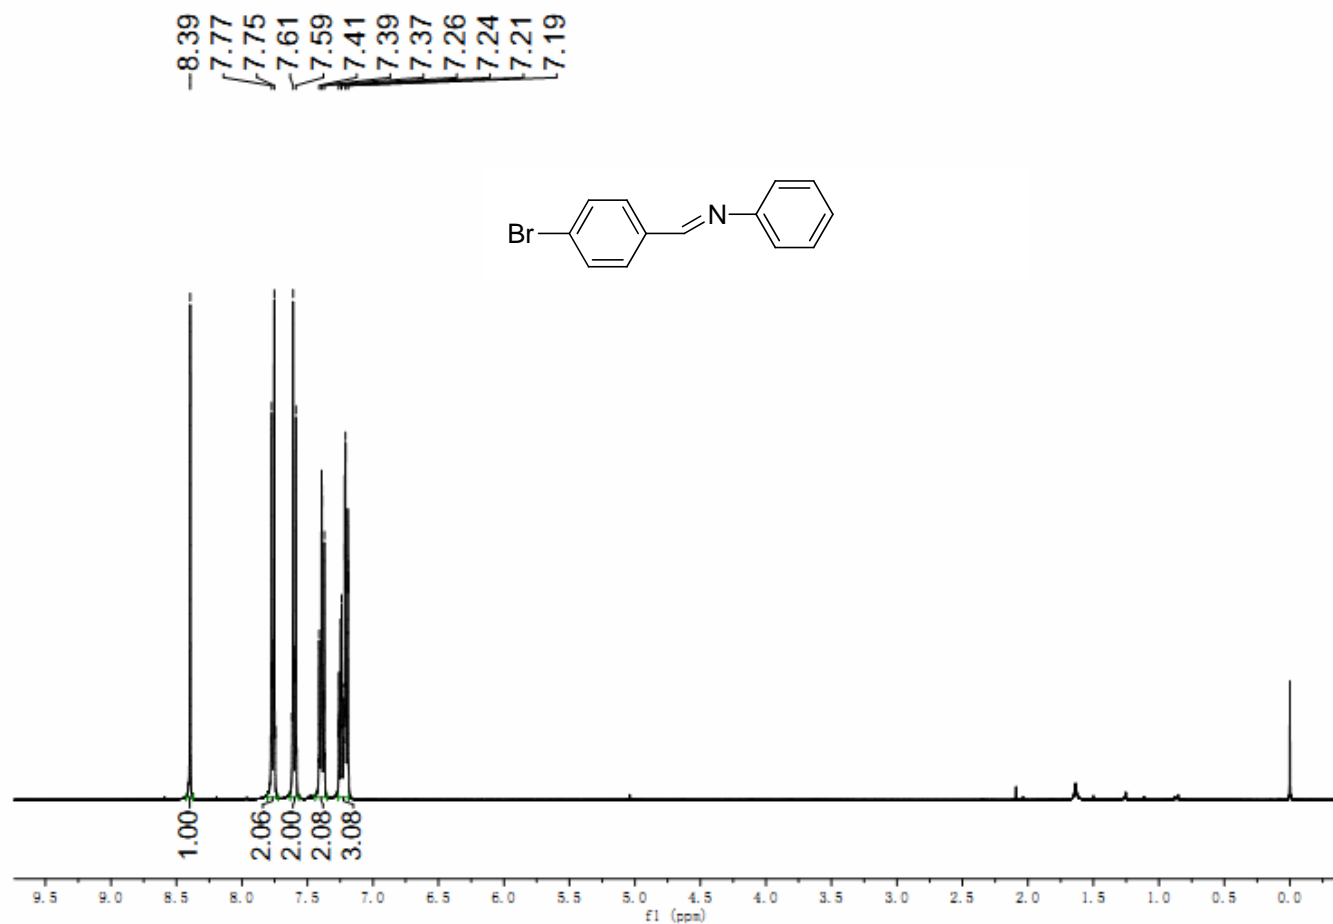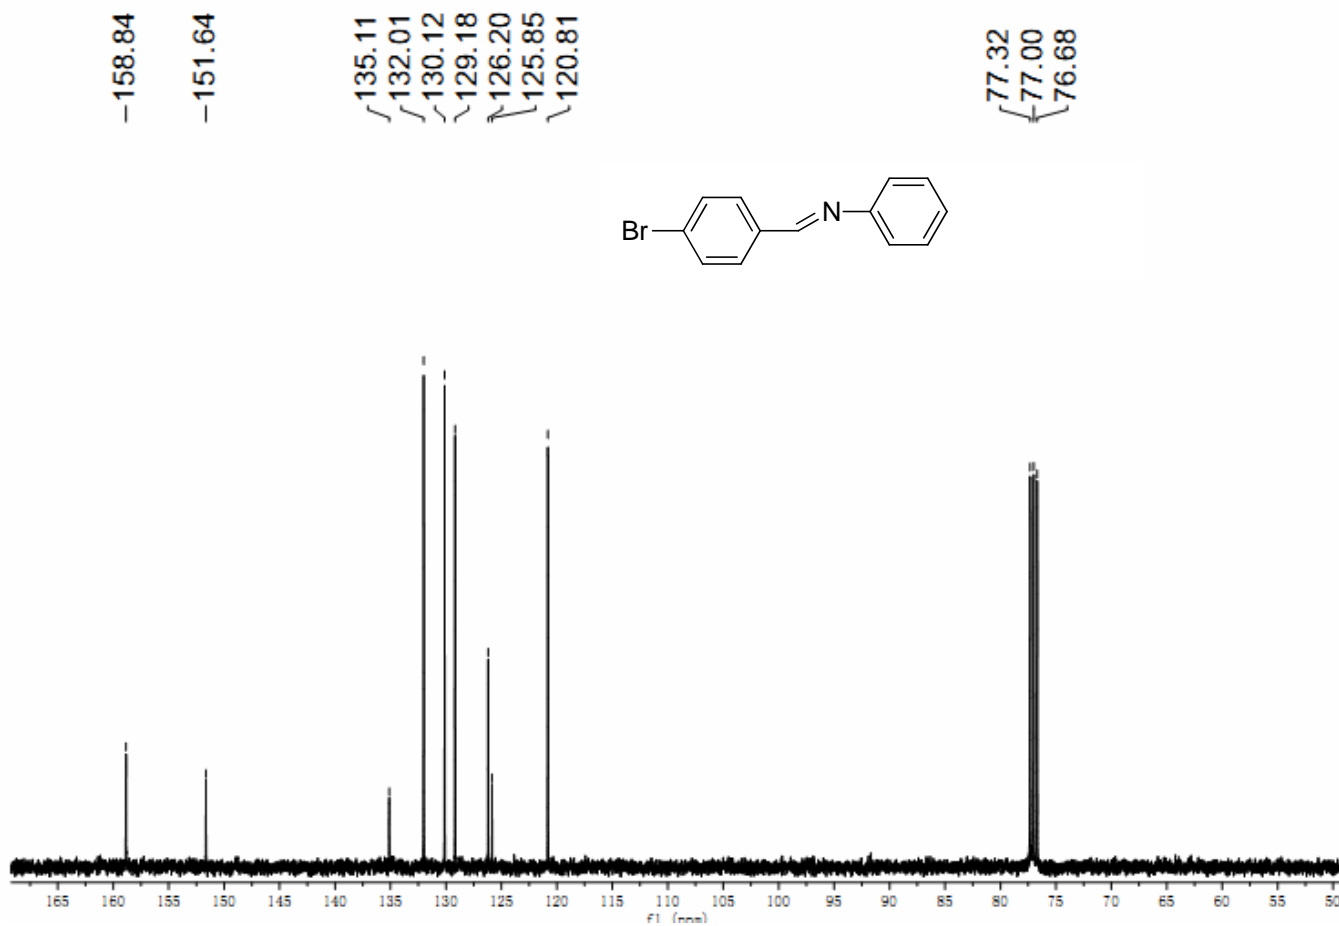

3q

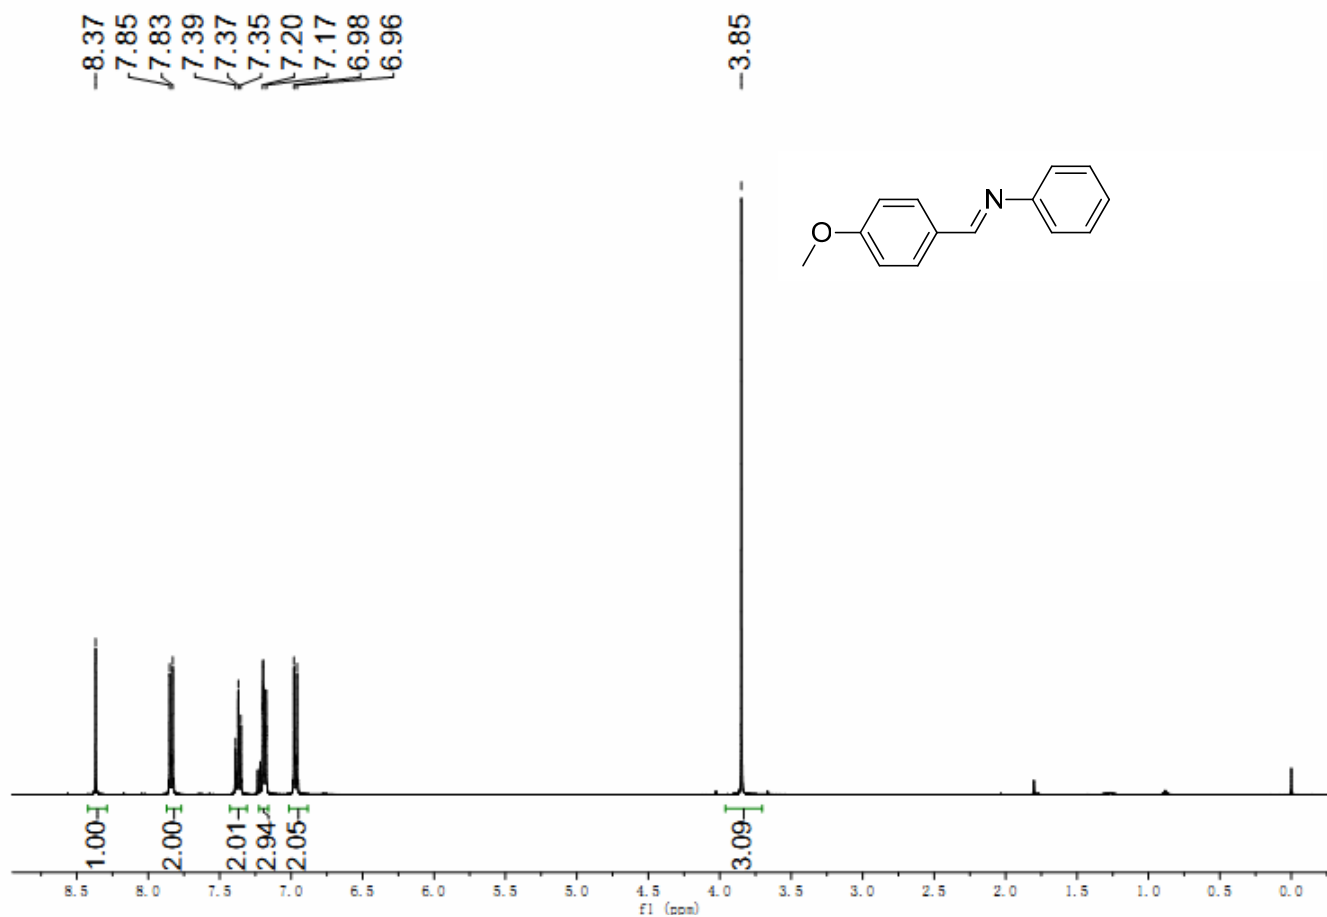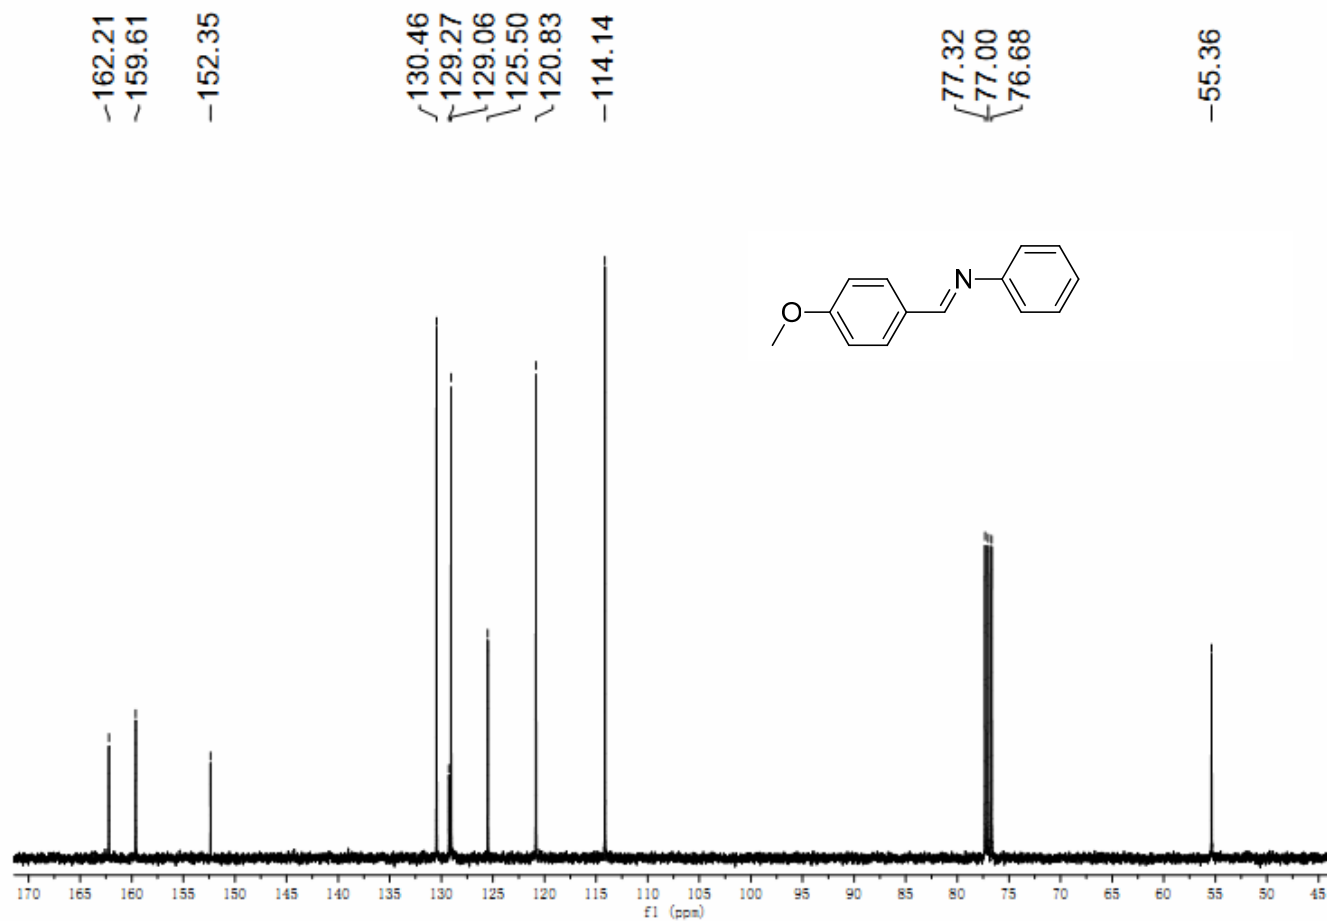

3r

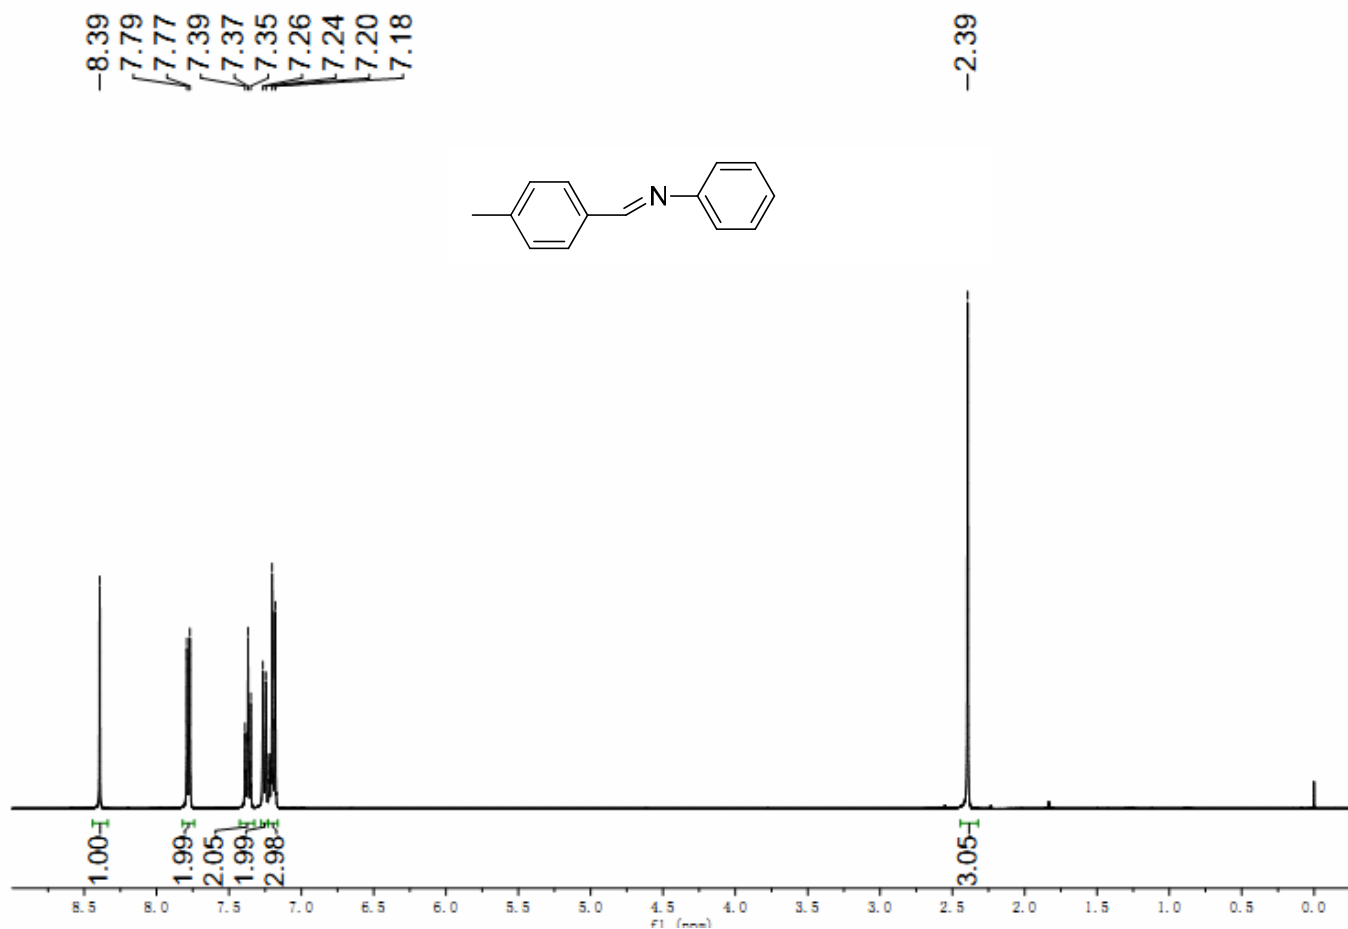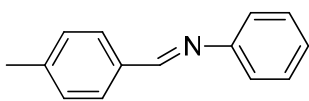

Chemical shift values (ppm) for the <sup>1</sup>H NMR spectrum:

|         |         |         |        |        |        |        |        |        |       |       |       |        |
|---------|---------|---------|--------|--------|--------|--------|--------|--------|-------|-------|-------|--------|
| -160.24 | -152.23 | -141.77 | 133.66 | 129.45 | 129.06 | 128.76 | 125.68 | 120.82 | 77.32 | 77.00 | 76.68 | -21.56 |
|---------|---------|---------|--------|--------|--------|--------|--------|--------|-------|-------|-------|--------|

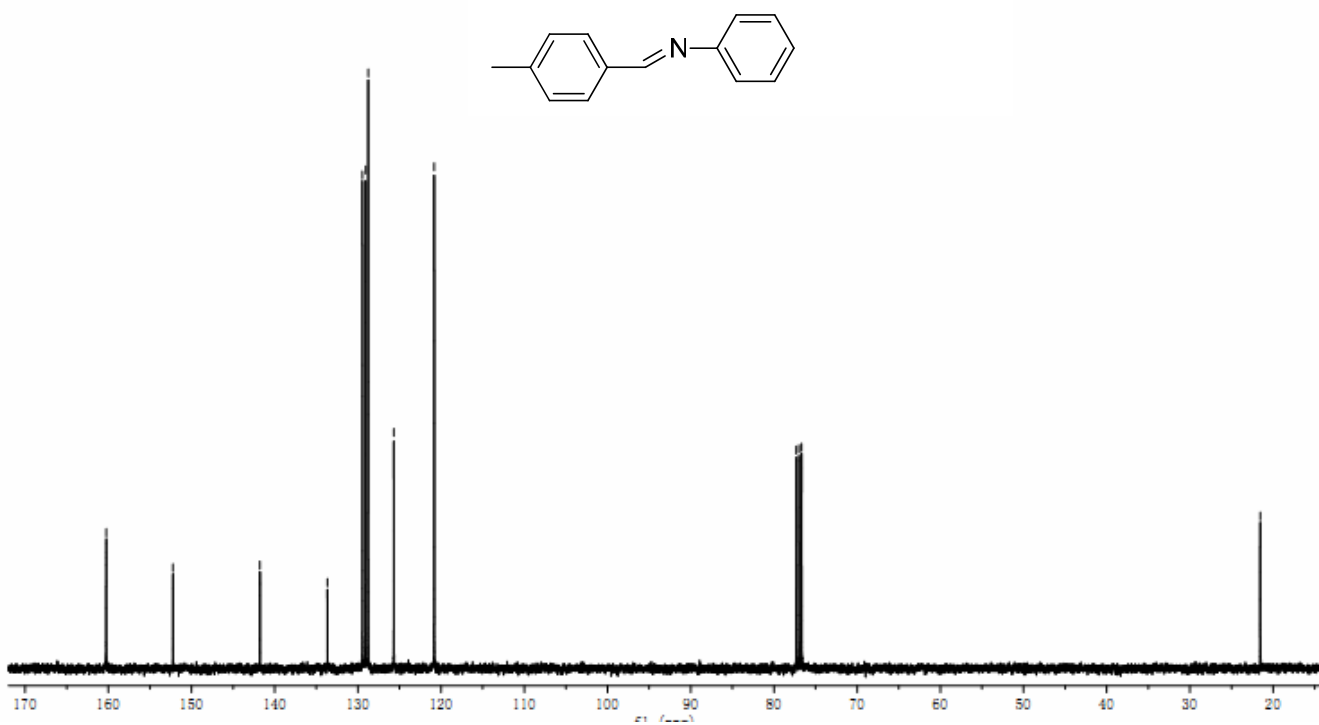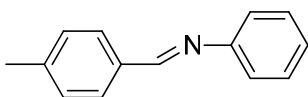

3s

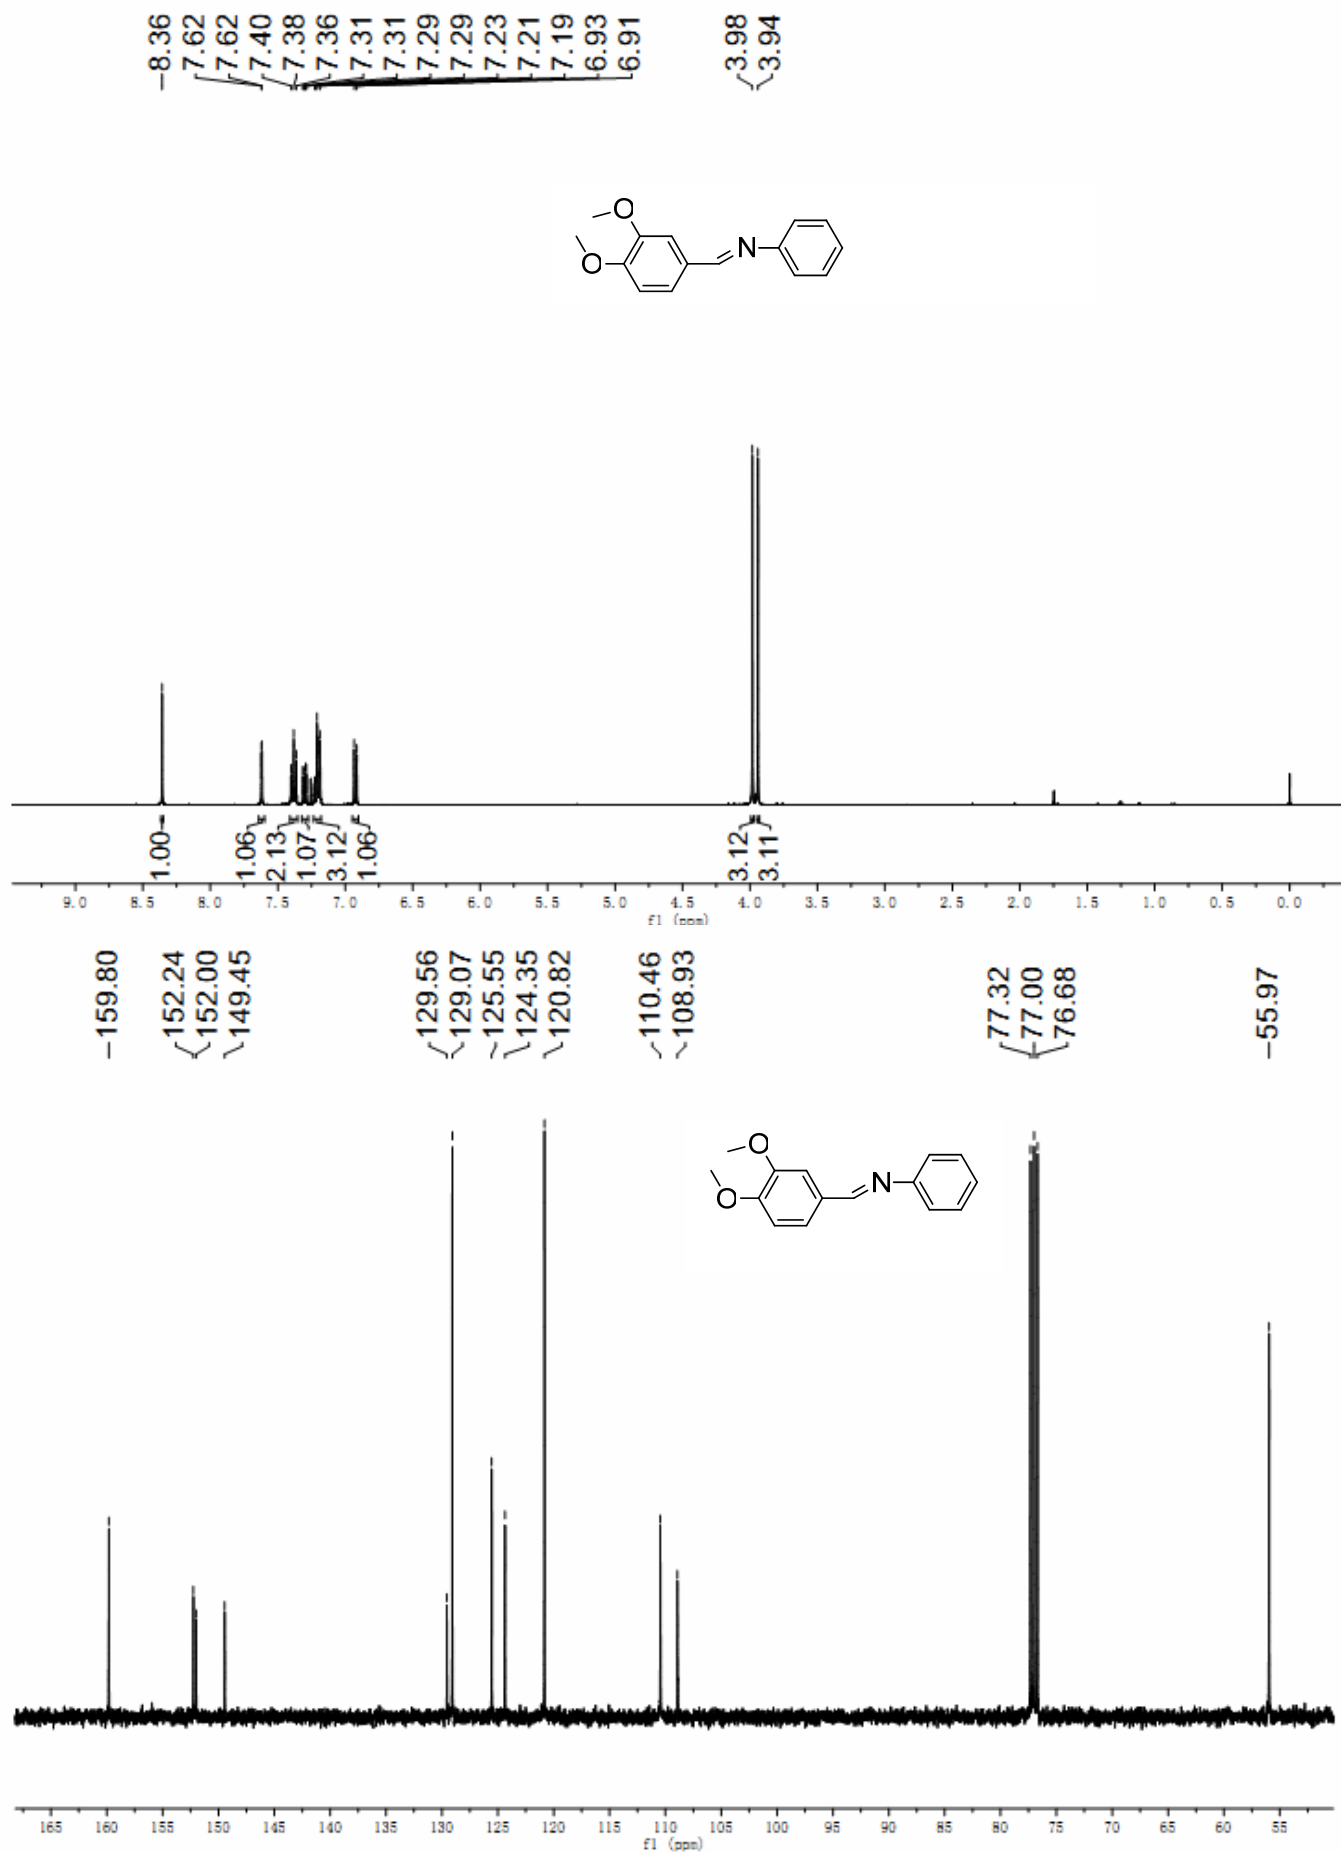

Supplement: c2gc35714c.pdf [file c2gc35714c.pdf]
